1 **Integrative biology defines novel biomarkers of**  
2 **resistance to strongylid infection in horses**

3

4 Guillaume Sallé<sup>1,\*</sup>, Cécile Canlet<sup>2</sup>, Jacques Cortet<sup>1</sup>, Christine Koch<sup>1</sup>, Joshua Malsa<sup>1</sup>, Fabrice  
5 Reigner<sup>3</sup>, Mickaël Riou<sup>4</sup>, Noémie Perrot<sup>4</sup>, Alexandra Blanchard<sup>5</sup>, Nuria Mach<sup>6</sup>

6

7 <sup>1</sup>, INRAE, Université de Tours, UMR 1282 Infectiologie et Santé Publique, F-37380 Nouzilly, France

8 <sup>2</sup>, INRAE, Université de Toulouse, ENVT, INP-Purpan, UPS, UMR 1331 Toxalim, F-31027 Toulouse,

9 France

10 <sup>3</sup>, INRAE, UE 1297 Physiologie Animale de l'Orfrasière, F-37380 Nouzilly, France

11 <sup>4</sup>, INRAE, UE 1277 Plateforme d'infectiologie expérimentale, F-37380 Nouzilly, France

12 <sup>5</sup>, Pancosma, Rolle, Switzerland

13 <sup>6</sup>, Université Paris-Saclay, INRAE, AgroParisTech, Génétique Animale et Biologie Intégrative, 78350

14 Jouy-en-Josas, France

15

16 \*, Corresponding author

17 Email: [Guillaume.Salle@inrae.fr](mailto:Guillaume.Salle@inrae.fr)

18

19

## 20 **Abstract**

21 The widespread failure of anthelmintic drugs against nematodes of veterinary interest requires  
22 novel control strategies. Selective treatment of the most susceptible individuals could reduce  
23 drug selection pressure but requires appropriate biomarkers of the intrinsic susceptibility  
24 potential. To date, this has been missing in livestock species. Here, we selected Welsh ponies  
25 with divergent intrinsic susceptibility to cyathostomin infection and found that their potential  
26 was sustained across a 10-year time window. Using this unique set of individuals, we  
27 monitored variations in their blood cell populations, plasma metabolites and faecal microbiota  
28 over a grazing season to isolate core differences between their respective responses under  
29 worm-free or natural infection conditions. Our analyses identified the concomitant rise in  
30 plasmatic phenylalanine level and faecal *Prevotella* abundance and the reduction in circulating  
31 monocyte counts as biomarkers of the need for drug treatment. This biological signal was  
32 replicated in other independent populations. We also unravelled an immunometabolic  
33 network encompassing plasmatic beta-hydroxybutyrate level, short-chain fatty acid  
34 producing bacteria and circulating neutrophils that forms the discriminant baseline between  
35 susceptible and resistant individuals. Altogether our observations open new perspectives on  
36 the susceptibility of equids to cyathostomin infection and leave scope for both new  
37 biomarkers of infection and nutritional intervention.

38

## 39 **Keywords**

40 horse; nematode; cyathostomin; gut microbiota; metabolomic; <sup>1</sup>H-NMR; blood; neutrophil;

41 16S

42

## 43 **Introduction**

44 Infection by gastro-intestinal nematodes is a major burden for human development worldwide  
45 as they both affect human health<sup>1</sup> and impede on livestock production<sup>2</sup>. Worldwide reports of  
46 anthelmintic drug failures against nematodes of veterinary importance have accumulated<sup>3</sup>,  
47 threatening the sustainability of livestock farming in some areas. The same pattern applies in  
48 horses whereby widespread benzimidazole failure and intermediate pyrantel efficacy against  
49 cyathostomin populations have been reported<sup>4-6</sup>. These small strongyles locate in their host  
50 hindgut and are responsible for growth retardation in young animals<sup>7,8</sup>. The massive  
51 emergence of developing larval stages from the caeco-colic mucosa can cause a larval  
52 cyathostominosis syndrome<sup>9</sup> that remains a leading cause of parasite-mediated death<sup>10</sup>.  
53 Factors contributing most to the selection of drug-resistant cyathostomin populations in  
54 equids remain uncertain<sup>4,5</sup>. However, significant and heritable inter-individual variation in  
55 resistance to strongylid infection has been reported in both domestic<sup>11,12</sup> and wild horse  
56 populations<sup>13</sup>. This variation leaves scope for restricting drug application to the most  
57 susceptible horses, thereby alleviating the selection pressure on parasite populations. To  
58 date, the genetic architecture of this trait has not been defined in equids, although indications  
59 from ruminant species would be in favour of a polygenic architecture<sup>14-16</sup> defining a stronger  
60 type 2 cytokinetic polarization in resistant individuals<sup>17,18</sup>.  
61 Identifying biomarkers of this intrinsic resistance potential would both contribute to  
62 understanding the host-parasite relationship and to defining relevant biomarkers for use in  
63 the field. Current targeted-selective treatment schemes are based on faecal egg count (FEC)  
64 that has suboptimal sensitivity and remains time-consuming despite recent advances that  
65 should ease egg detection<sup>19</sup>. As a result, its uptake in the field varies widely across countries  
66 and remains limited<sup>5,20</sup> despite being cost-effective<sup>21,22</sup>. To date, limited alternative biomarkers  
67 have been identified. Alteration in serum albumin level and decrease in circulating  
68 fructosamine were the main features found in cyathostomin infected ponies<sup>23</sup>. Independent

69 observations concluded that mixed strongyle infection was associated with mild inflammatory  
70 perturbations<sup>24</sup>. We previously highlighted that susceptible ponies had lower monocyte but  
71 higher lymphocyte counts than resistant individuals upon natural strongylid infection<sup>25</sup>. More  
72 susceptible individuals also exhibited differential modulation of their faecal microbiota,  
73 including enrichment for the *Ruminococcus* genera<sup>25</sup>, corroborating independent  
74 observations of alterations in the gut microbiota composition of infected horses<sup>25-28</sup>.

75 In horses as in other host-parasite systems, limited efforts have been made to isolate  
76 compositional shifts in plasma metabolites following parasite nematode infection. Beyond  
77 murine models of helminth infection<sup>29,30</sup>, implementation of this technology could define a  
78 urinary biomarker of infection by *Onchocerca volvulus* in humans<sup>31</sup>. This was however not  
79 reproduced in other cohorts of patients<sup>32</sup>. In livestock species, a single study has applied  
80 metabolomic profiling on horse faecal matter to identify biomarkers of infection by parasitic  
81 nematodes but found little differences between horses with contrasted levels of strongylid  
82 infection<sup>26</sup>.

83 In any case, these observations remain limited to individual host compartments and do not  
84 provide an integrated perspective of the physiological underpinnings associated with  
85 susceptibility to infection. Because we are aiming to distinguish between individuals before  
86 the onset of degraded clinical signs, the biological signals may be subtle. To this respect,  
87 integration of systems biology data - that consider multiple high-dimensional measures from  
88 various host compartments - is expected to better identify the multiple features defining a  
89 given physiological state<sup>33</sup>.

90 Under this assumption, we combined and analysed metabolomic, metagenomic and clinical  
91 data collected on a selected set of intrinsically resistant and susceptible ponies to identify the  
92 physiological components underpinning their resistance potential. Our data defined a  
93 strongylid infection signature built around lower circulating monocytes, enriched plasmatic  
94 phenylalanine concentration and higher *Prevotella* load in faecal microbiota that we could  
95 replicate in independent populations. We also identified an immunometabolic signature

96 centered on neutrophils that best discriminated between resistant and susceptible individuals  
97 across strongyle-free or natural infection conditions. These results begin to define the  
98 physiological bases supporting the intrinsic resistance potential to strongylid infection in  
99 equids.  
100

## 101 **Results**

102 This experiment was based on a set of individual Welsh ponies with divergent resistance  
103 potential to strongylid infection. During the experiment (2015), we produced metabolomic  
104 data that we present herein and integrated this plasma-related dataset with previously  
105 described faecal bacteria profiles and clinical parameters<sup>25</sup>. We analysed the data produced  
106 for each group under worm-free conditions (day 0) or following natural infection (day 132) to  
107 i) identify biomarkers of infection, ii) establish a holistic view of the physiological  
108 underpinnings of the resistance potential to strongyle infection in horses.

### 109 **1. Pony divergence toward strongyle infection is significant and sustained**

110 We selected 20 female Welsh ponies with divergent susceptibility to strongylid infection. Their  
111 susceptibility potential was predicted from their past FEC history (at least three FEC records  
112 over two years between 2010 and 2015). During the experiment (2015) and following natural  
113 infection (day 132), 17 ponies displayed FEC values in good agreement with their predicted  
114 potential. In that case, 8 of the susceptible ponies (**TS**) had FEC above the considered 200  
115 eggs/g cut-off for treatment (average FEC =  $419 \pm 149$  eggs/g) at day 132, and 9 resistant  
116 ponies (**TR**) were below this threshold (average FEC =  $56 \pm 77$  eggs/g). Our prediction hence  
117 achieved an accuracy of 85%. Other ponies that did not match expectations had either higher  
118 susceptibility (850 eggs/g for the predicted resistant individual) or too low FEC (0 and 50  
119 eggs/g for the two susceptible individuals).

120 In agreement with this observation, FEC measured in the TS and TR ponies during the five  
121 years preceding the experiment departed significantly from the herd mean (0.6 standard  
122 deviations ;  $P = 0.01$  and  $P = 0.02$  for TS and TR groups respectively; Fig 1). To ensure that  
123 their intrinsic potential was true, we compared their FEC records collected after the  
124 experiment took place (between 2015 and 2020) to that of their herd (1,436 individual records).  
125 We confirmed that their divergence was sustained ( $-0.76$  and  $+0.63$  standard deviation from  
126 mean in TS and TR ponies respectively;  $P = 0.02$  in both cases) throughout the following years

127 (Fig 1), hence validating their intrinsic potential. This corresponded to an average FEC of 43  
128 eggs/g (min = 0; max = 2,200 eggs/g) and 756 eggs/g (min = 0; max = 2,800 eggs/g) in TR  
129 and TS ponies respectively, while the average herd FEC was 320 eggs/g (min = 0; max =  
130 5,400 eggs/g).

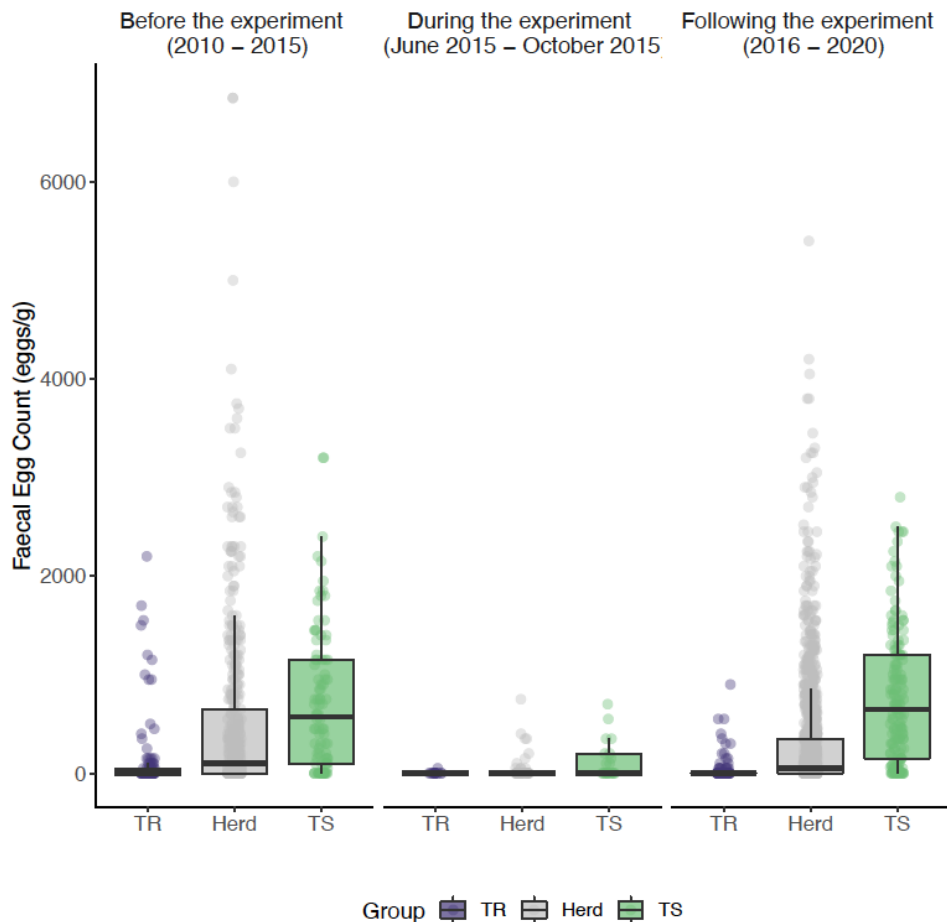

131  
132 **Figure 1. FEC-informed pony potential prediction is robust through time**  
133 The distribution of observed Faecal Egg Counts before the experiment (2010-2015), during the  
134 experiment (2015) and after the experiment (2015-2020) in the predicted susceptible (8 individuals, 271  
135 records; green) and resistant (9 individuals, 223 records; purple) ponies and their herd unselected  
136 counterparts (127 individuals, 1,436 measures; grey) is represented. Dots stand for individual measures  
137 and boxplots represent the data distribution (mean materialized by a vertical bar within the box that  
138 stands for the 25% to 75% interquartile range).

139

140        **2. Metabolomic profiling highlights the association between plasmatic**  
141        **phenylalanine level and FEC**

142        To identify markers of pony intrinsic resistance potential, we measured variation in their  
143        plasma metabolites using <sup>1</sup>H-NMR between worm-free conditions (day 0) and after natural  
144        infection (day 132). This metabolomic profiling of TR and TS ponies throughout the grazing  
145        seasons found a total of 791 metabolic buckets, corresponding to 119 unique metabolite  
146        signals (Fig 2, supplementary Table 1). These included several amino acids, energy  
147        metabolism-related metabolites, saccharides, unknown lipids, and organic osmolytes in the  
148        plasma. Among these signals, we observed 29 unassigned bins in three main windows  
149        ranging between 1.115 and 1.435 ppm, 3.385 and 4.305 ppm or 6.805 and 7.895 ppm  
150        (supplementary Table 1).

151        The ANOVA – simultaneous component analysis (ASCA) applied to metabolomic time series  
152        data identified significant temporal variation ( $P < 0.001$ ) but no differential rewiring occurred  
153        between TR and TS pony metabolomes ( $P = 0.54$ ). The temporal variation was structured  
154        around five signals (supplementary Fig 1) associated with alkalene moieties from lipids (<sup>1</sup>H-  
155        NMR signal at 5.265–5.355 ppm), sugar moieties of α- and β-glucose (3.455–3.555 ppm) in  
156        overlap with proline (3.395–3.445 ppm) and branched-chain amino-acids (BCAAs) such as  
157        valine (1.045–1.055 ppm) and leucine (0.965–0.975 ppm). These signals showed mean  
158        leverage of 3.4% (ranging between 1.5% and 7.8%) and squared prediction error below  $2.2$   
159         $\times 10^{-5}$ . Among these, the high-intensity signals ascribable to glucose decreased between the  
160        strongyle-free (day 0) and strongyle-infected (day 132) conditions (supplementary Fig 1).



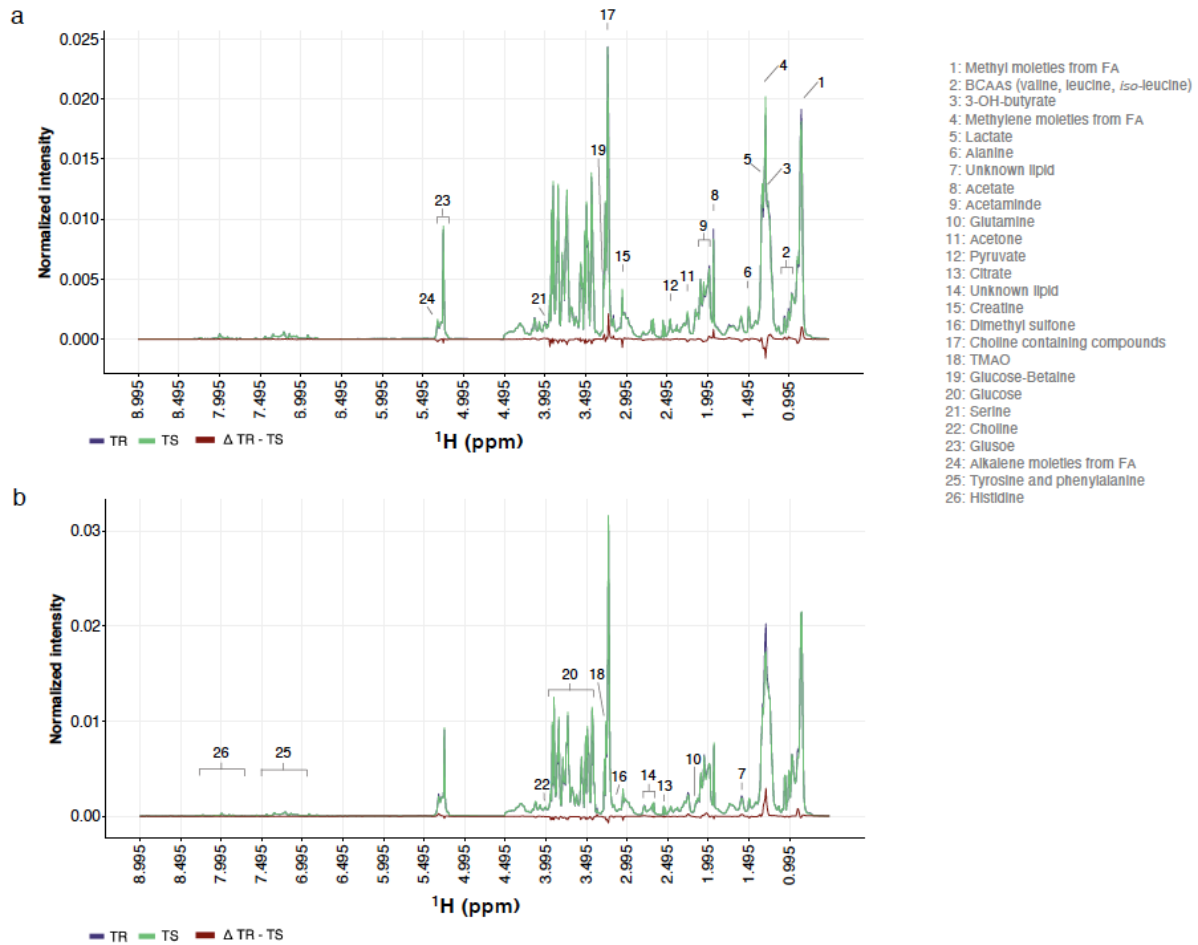

161

162 **Figure 2. Representative <sup>1</sup>H-NMR spectra measured in resistant and susceptible ponies**

163 Group average <sup>1</sup>H-NMR signal intensities are plotted against the considered chemical shifts ranging  
164 from 0.995 to 8.995 ppm and overlaid for resistant (TR; purple) and susceptible (TS; green) pony groups  
165 at day 0 (strongyle-free; panel a) or day 132 (strongyle infected; panel b). Differential intensity between  
166 groups is drawn in red. Associated metabolites are annotated by numbers.

167

168 Despite the lack of systematic modifications of metabolomes between TR and TS ponies, we  
169 sought to identify individual metabolites that would reflect the intrinsic susceptibility status of  
170 ponies before any infection took place (day 0) or metabolites that would differentiate  
171 individuals in need of treatment at the end of the grazing season (day 132). Considering the  
172 nominal *P*-values of 5%, we identified differences in dimethyl-sulfone and lysine associated  
173 signals that were all decreased in the TS pony group (supplementary Fig 2a). None of these

174 signals were however significantly correlated with final FEC measured at day 132 (Spearman's  
175  $\rho$  ranging between -0.08 and 0.34, supplementary Fig 2b).

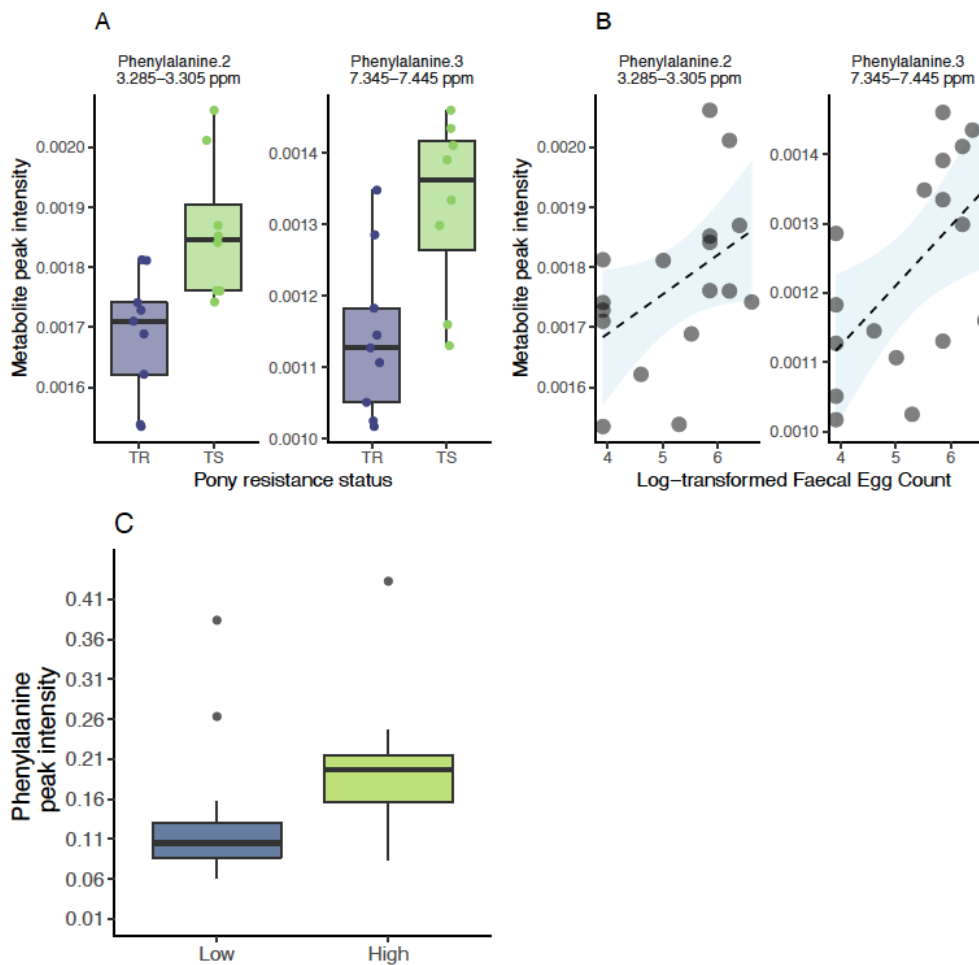

176

177 **Figure 3. Differential metabolites between infected resistant and susceptible ponies (day 132)**

178 Panel A shows metabolite signal intensity distribution in each pony susceptibility group (purple:  
179 resistant, TR; green: susceptible, TS) at day 132. Panel B shows the relationship between these  
180 metabolite signal intensities (X-axis) at day 0, and matching log-transformed Faecal Egg Count (Y-axis)  
181 at day 132. Panel C describes observed phenylalanine levels in the faecal matter of an independent  
182 cohort of British horses with low or high FEC <sup>26</sup>.

183

184 The same approach applied to TR and TS ponies after natural infection at day 132 found  
185 lower levels of phenylalanine (<sup>1</sup>H-NMR signals at 3.285-3.305 ppm and 7.345-7.445 ppm) in  
186 TR compared to TS ponies (nominal P-value =  $6 \times 10^{-3}$ ). In addition, an unidentified metabolite  
187 between 6.815-6.815 ppm (U13) was significantly lower in TR ( $P = 0.04$ ). Phenylalanine signal

188 intensities increased with FEC (Spearman's  $\rho$  ranging between 0.55 and 0.60,  $P < 0.05$ ,  $n =$   
189 17). Using the faecal metabolomic data from another independent set of British horses<sup>26</sup>, we  
190 could validate this signal. In that study and in line with our results, faecal phenylalanine level  
191 was significantly increased in horses with higher FEC (*Wilcoxon's test* = 27,  $P$ -value = 0.02,  
192 Fig 3C).

193 Altogether these results indicate that strongylid infection experienced by TR and TS ponies  
194 did not induce metabolome-wide modifications. However, phenylalanine was the most  
195 discriminant between TR and TS ponies under infection and stands as a biomarker of the  
196 need for treatment.

197

### 198 **3. Multi-compartment data integration identifies circulating monocytes,** 199 **phenylalanine and faecal *Prevotella* levels as discriminant features under** 200 **infection**

201 To mine the physiological differences between infected TR and TS ponies deeper, we applied  
202 a data integration framework (sGCC-DA) bringing together clinical, metabolomic and  
203 previously analyzed faecal microbiota data from these individuals<sup>25</sup>. The first component of  
204 the sGCC-DA better discriminated between TR and TS ponies and retained nine clinical  
205 parameters, 15 bacterial genera and ten plasma metabolite signals (Fig 3, supplementary Figs  
206 3 and 4).

207 The network of correlations between these features was structured around two major clusters  
208 (Fig 4, supplementary Figs 3 and 4). A first core of features built around average daily gain  
209 (ADG) and four commensal gut bacterial genera (*Anaerovibrio*, *Fibrobacter*, *Prevotella*, and  
210 *Treponema*) displayed higher levels in TR ponies under infection (Fig 4, supplementary Figs 3  
211 and 4). These features were negatively correlated to a strongylid susceptibility-associated  
212 cluster that encompassed neutrophil counts ( $2.8 \pm 0.51$  and  $3.05 \pm 0.8$  million cells/mm<sup>3</sup> in  
213 TR and TS ponies), the haematocrit (average of  $38.74\% \pm 1.7$  vs.  $41.45\% \pm 4.1$  in TR and TS

214 ponies) and the plasmatic levels of serine and essential amino acids such as phenylalanine,  
215 lysine and tryptophan (Fig 4, supplementary Figs 3 and 4). This underscores the association  
216 between phenylalanine and FEC (Fig 3b, c).

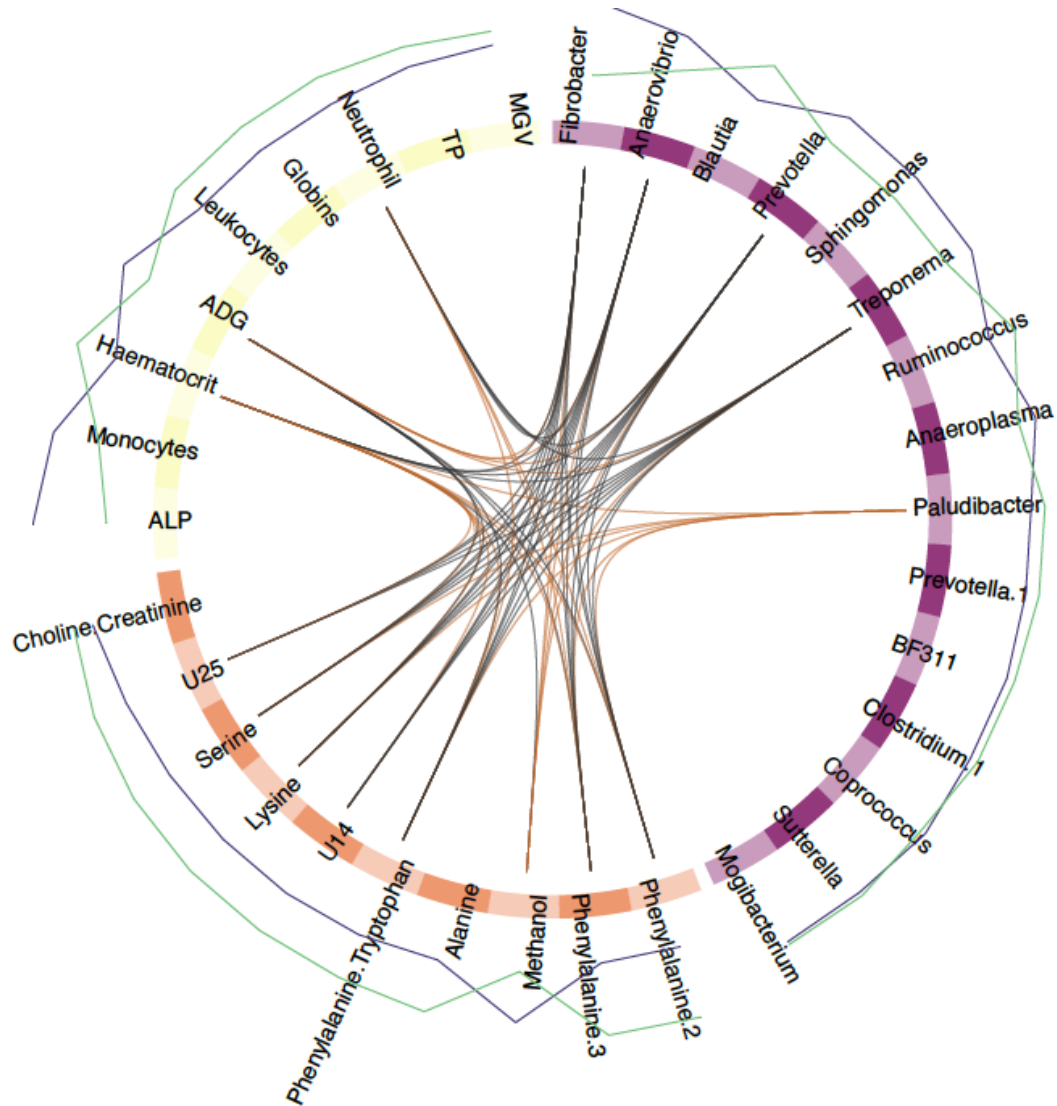

217  
218 **Figure 4. Circos plot showing features best discriminating between infected resistant and**  
219 **susceptible ponies (day 132)**

220 For each of the three input data types (clinical data in yellow, bacterial genera in purple and metabolite  
221 signals in orange), the features best discriminating between resistant and susceptible ponies are listed.  
222 A link is materialized between two features if their shared correlation is above 0.45 (chocolate if positive,  
223 grey otherwise). External green and purple lines represent the relative feature level in each pony  
224 susceptibility group (resistant, TR: purple; susceptible, TS: green). MGW: Mean Globular Volume; TP:  
225 Total Protein; ALP: Alkaline Phosphatase; U14, U25: Unknown metabolites 14 and 25.

226

227 Additional features included higher monocyte counts ( $1.178 \pm 0.23$  and  $1.038 \pm 0.24$  million  
228 cells/ $\text{mm}^3$  in TR and TS ponies on average) and higher levels of plasmatic alkaline  
229 phosphatase (ALP;  $5.39 \pm 0.15$  and  $5.25 \pm 0.12$  Units/L) in TR ponies (Fig 4). But these  
230 parameters displayed least covariation with other parameters (Fig 4).

231 Analysis for KEGG pathway enrichment of metabolite signals found significant over-  
232 representation of Aminoacyl-tRNA biosynthesis (FDR =  $1.1 \times 10^{-4}$ ) underpinned by the  
233 presence of alanine, lysine, phenylalanine, serine, and tryptophan (supplementary Table 2).  
234 Of note, alanine and phenylalanine plasmatic levels defined significant enrichment for the  
235 dengue fever (supplementary Table 2). The most significant enrichment was defined by the  
236 *Blautia*, *Coprococcus* and *Ruminococcus* association found in forms of pediatric Crohn's  
237 disease (FDR =  $2.5 \times 10^{-3}$ ). Two other significant enrichments included infection-mediated  
238 perturbations associated with the HIV-1 virus in humans (underpinned by *Anaerovibrio* and  
239 *Clostridium* genera, FDR =  $1.12 \times 10^{-4}$ ) or with murine model of *Plasmodium* infection  
240 (underpinned by *Anaeroplasma* and *Clostridium*, FDR = 0.05).

241 To validate the association of the most discriminant blood and bacterial features with FEC,  
242 we used either a previously published horse data set<sup>26</sup> for bacterial count, or additional blood  
243 samples taken from 25 strongylid infected ponies in 2020 (Fig 5). Out of the five most  
244 discriminating bacterial genera identified by our sGCC-DA approach under infection at day  
245 132, *Prevotella* (FDR = 0.19; nominal *P-value* = 0.04) also showed significant differences in  
246 their mean abundances between Peachey et al.'s horses with low or higher FEC (Fig 5).  
247 Monocyte counts were also negatively correlated with FEC levels in the independent set of  
248 ponies (Spearman's  $\rho = -0.31$ , *P-value* = 0.14; Fig 5).

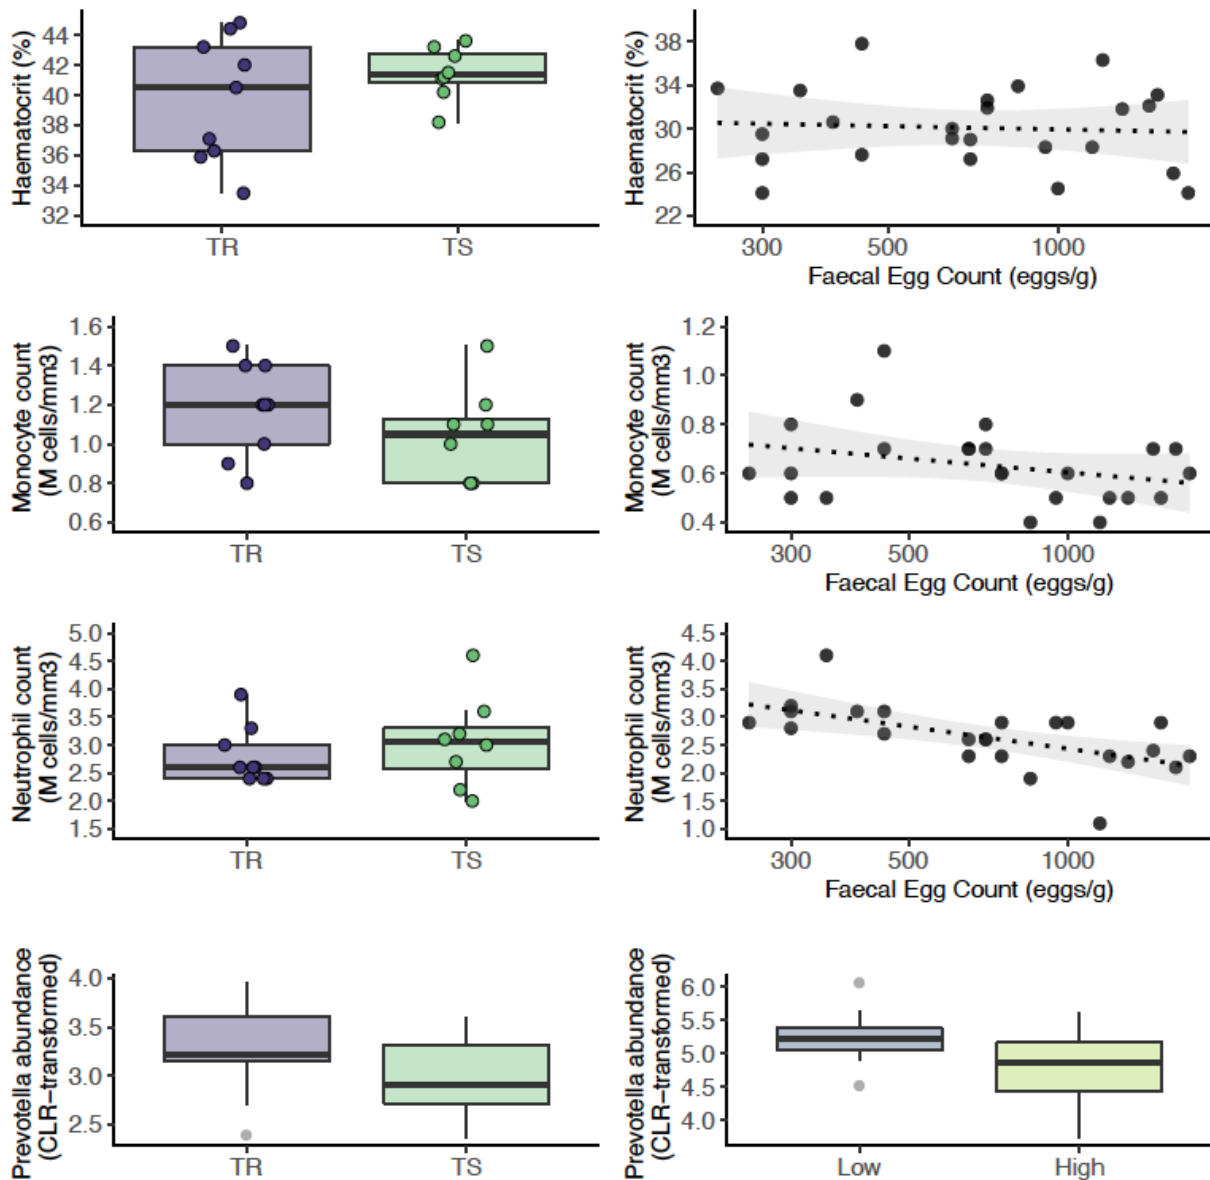

249

250 **Figure 5. Validation of the most discriminant features between resistant and susceptible ponies**  
251 **under strongylid infection**

252 Each row presents the feature level in resistant and susceptible ponies (left panels) and the association  
253 with Faecal Egg Count recorded in an independent set of ponies or horses (for the *Prevotella* genus).

254 CLR: Centered Log-Transformed. The figure highlights the significant positive relationship between

255 circulating monocyte count and faecal abundance of the *Prevotella* genus in independent individuals.

256

257 The trend was however opposite for the neutrophil population (Spearman's  $\rho = -0.63$ , *P-value*  
258  $= 9 \times 10^{-4}$ ; Fig 5) and no relationship between FEC and haematocrit was found in this independ  
259 set of individuals (Spearman's  $\rho = -0.07$ , *P-value* = 0.7; Fig 5).

260 These findings hence retain increased *Prevotella* abundance in faecal material as a conserved  
261 signal in equids with reduced FEC, and monocyte counts appears to be a good predictor of  
262 FEC level.

263

#### 264 **4. Short-chain fatty acid producing bacteria, plasmatic lysine and circulating** 265 **neutrophils recapitulate pony intrinsic potential across conditions**

266 Using the same analytical framework, we aimed to identify features that would best define  
267 the intrinsic pony resistance potential across worm-free or natural infection conditions.

268 The sGCC-DA applied on records measured under worm-free conditions (day 0) identified  
269 reduced circulating neutrophil and leukocyte counts in the TR ponies as the most discriminant  
270 clinical parameters (supplementary Figs 5, 6, and 7). Cell counts of these two populations  
271 were tightly linked with plasmatic levels of 1-methylhistidine (7.785 ppm; reduced in TR  
272 ponies), lysine (1.445-1.465 and 1.845-1.915 ppm; increased in TR ponies) and  $\beta$ -  
273 hydroxybutyrate (4.125-4.135 ppm; increased in TR ponies). In addition to these parameters,  
274 maximal covariance was obtained for a few genera from the Actinomycetia class (order  
275 Corynebacteriales), namely *Dietzia*, *Gordonia*, *Mycobacterium* and *Sacharopolyspora* (order  
276 Pseudonocardiales), that all showed higher relative abundances in resistant ponies, as well  
277 as the candidate genera BF311 within Bacteroidetes (e.g., *BF311*; supplementary Figs 5). On  
278 the opposite, higher relative abundance of butyrate-producing Clostridia, specifically  
279 *Anaerofustis*, *Coprococcus* and *Ruminococcus* were found in TS ponies (supplementary Figs  
280 5). These genera showed positive correlations with circulating lymphocytes and neutrophil  
281 counts (ranging between 0.51 and 0.68 for lymphocyte counts and between 0.38 and 0.51 for  
282 neutrophil counts respectively; supplementary Figs 5 and 7). Of note, the presence of

283 *Prevotella* and *Desulfovibrio* among the set of covarying features defined significant  
284 enrichments compatible with *Plasmodium* infection in mice or *Schistosoma haematobium*  
285 infection in humans (FDR = 0.04 in both cases; supplementary Table 2).

286 Combining these differential features between pony groups under worm-free conditions with  
287 that found after strongylid infection retained a core set of seven markers consistently  
288 discriminating TR and TS ponies across infection conditions (supplementary Fig 8). For these  
289 markers, we aimed to identify differential trends between both groups across infection  
290 conditions.

291 First, circulating neutrophil and leukocyte counts showed significant increase following  
292 infection ( $P = 0.02$  and  $4 \times 10^{-4}$  respectively), but this increase was not different between TR  
293 and TS ponies ( $P = 0.5$  in both cases; supplementary Fig 8 and supplementary Table 3). This  
294 trend was also not corroborated in another independent set of individuals (Fig 5).

295 Second, plasmatic lysine level was significantly different between infected TR and TS ponies  
296 ( $P = 0.002$ ) and matched independent observations made in faecal samples from another  
297 cohort of British horses (Fig 6). Our temporal records also supported a differential decrease  
298 of plasmatic lysine levels between TR and TS ponies from worm-free to natural infection  
299 conditions ( $P = 0.02$ ).



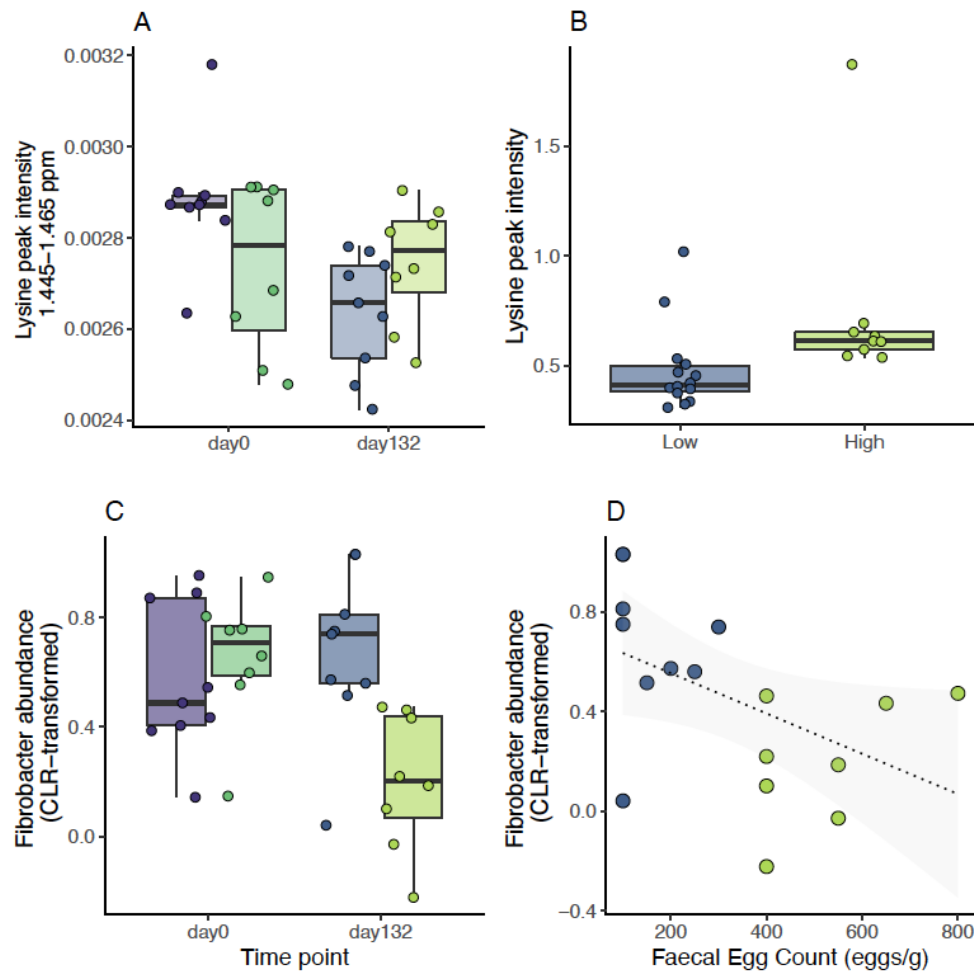

300

301 **Figure 6. Discriminant features between resistant and susceptible ponies across infection**  
302 **conditions**

303 Measured values of lysine signal intensity (A) and Fibrobacter abundance (C) are plotted across  
304 susceptibility groups (TR: resistant, in blue; TS: susceptible, in green) and time points (day0: before  
305 infection; day132: under strongylid infection, 132 days after the onset of grazing season). Lysine  
306 intensity measured on faecal material in an independent cohort of British horses with low or high  
307 Faecal Egg Count is represented in panel B. Panel D shows the relationship between Fibrobacter count in TR  
308 and TS ponies at day 132 and measured FEC.

309

310

311 Third, sGCC-DA recognized three dominant gut bacteria, namely *Fibrobacter*, *Ruminococcus*,  
312 and *Treponema*, and one rare microbial taxa (*Coprococcus*) as keystone species whose  
313 covariation formed a distinct signature between the two pony groups (Fig 6, supplementary  
314 Fig 8). Using linear regression modeling, we found a significant decrease in faecal abundance  
315 of *Treponema* ( $P = 1.7 \times 10^{-2}$ ) upon infection that was shared across pony groups  
316 (supplementary Fig 8). On the contrary, the observed rise in *Fibrobacter* abundance at day

317 132 was slightly milder in the TS ponies ( $-0.73 \pm 0.26$ , FDR =  $4.4 \times 10^{-2}$ ; Fig 4, supplementary  
318 Table 3).

319 Lysine and *Fibrobacter* would hence mark the intrinsically higher sensitivity of TS ponies.

320

321

## 322 Discussion

323 Inter-individual variation in susceptibility to strongylid infection offers the opportunity to  
324 reduce drug selection pressure by selectively treating the most susceptible individuals. To  
325 date, the physiological markers associated with this resistance potential are to be defined.  
326 Here, we selected resistant and susceptible ponies and confirmed that their potential was  
327 sustained over a 10-year time window. Using this unique set of individuals, we performed the  
328 first detailed investigations of the variations occurring in three different compartments (blood,  
329 plasma and faeces) to identify the underpinnings of their differential resistance to strongylid.  
330 Our findings are two-fold. First, we found support for defining phenylalanine, circulating  
331 monocytes and faecal abundance of *Prevotella* as biomarkers of strongylid infection in  
332 equids. Second, we identified an immunometabolic network encompassing beta-  
333 hydroxybutyrate level, short-chain fatty acid producing bacteria and circulating neutrophils  
334 that recapitulates the intrinsic resistance potential of ponies under both worm-free and natural  
335 infection conditions.

336 Elevation of plasmatic phenylalanine concentration has long been recognized as a metabolic  
337 consequence of bacterial and viral infections<sup>34</sup>. Similar observation has also been made in the  
338 faecal matter of infected horses<sup>26</sup> and we could replicate it from plasmatic samples. Of note,  
339 our data highlighted the covariation of this essential amino acid with average daily gain and  
340 the concomitant increase in plasmatic alkaline phosphatase concentration. This is compatible  
341 with strongyle infection reducing muscle protein synthesis (in line with observed reduced  
342 average daily gain), thereby increasing the extracellular release of phenylalanine and its  
343 subsequent uptake by the liver (whose activity was tracked by the increased alkaline  
344 phosphatase level). This model would match the theoretical framework derived from other  
345 infectious processes<sup>34</sup>. Altogether, plasmatic phenylalanine represents another diagnostic  
346 option for strongylid infection. The sensitivity and specificity of this marker remains to be

347 determined in a larger cohort for field use in association with monocyte count and faecal  
348 *Prevotella* abundance.

349 The concomitant increase in the plasmatic level of this aromatic amino acid with the monocyte  
350 count decrease upon infection in susceptible individuals also opens new perspectives on the  
351 pathophysiology associated with strongylid infection in equids. Indeed, observations in  
352 humans demonstrated that D-phenyllactic acid - an antibacterial compound derived from  
353 phenylalanine and produced by the gut microflora - can activate the hominid-specific  
354 Hydroxy-Carboxylic Acid (HCA) 3 G-protein coupled receptor expressed by monocytes,  
355 thereby favoring their recruitment<sup>35</sup>. While the only lactate-associated HCA1 receptor exists  
356 in equids, the possibility remains that phenylalanine derivatives could recruit immune cells<sup>36</sup>.  
357 Under this speculative model, serum phenylalanine (increased in infected individuals), would  
358 enter the gut lumen before subsequent transformation into phenyllactic acid by gut bacteria.  
359 Bacteria-derived phenyllactic would then be absorbed into the portal vein and serve as a  
360 recruitment signal for circulating monocytes. Further studies on this receptor would confirm  
361 its role in any differential immunometabolic regulations between the resistant and susceptible  
362 pony groups.

363 Under infection, susceptible individuals exhibited decreased abundance of faecal *Prevotella*.  
364 Effects of the *Prevotella* genus are still debated<sup>37</sup>. Experimental colonization of germ-free mice  
365 by *Prevotella* promoted the decrease of IL-18 interleukin expression, neutrophil recruitment  
366 at the site of infection and gut inflammation<sup>37</sup>. *Prevotella* was also associated with  
367 susceptibility to *Plasmodium* infection in mice<sup>38</sup>, increased in patients infected by the human  
368 trematode *S. haematobium*<sup>39</sup> and in the colon of pigs infected by *Trichuris suis*<sup>40</sup>. A *Prevotella*-  
369 led inflammatory state would hence define the reduced strongyle infection observed in  
370 resistant ponies. This would contradict past findings in mice showing the detrimental  
371 association between IL-18 and *Trichuris muris* infection<sup>41</sup>. Because this cytokine seems to be  
372 sensitive to its environment, there is scope for microbiota-based regulations<sup>42</sup> that would  
373 differ between resistant and susceptible individuals.

374 In our attempt to discriminate between resistant and susceptible ponies, we identified a  
375 feature network with contrasted proinflammatory abilities. First, resistant ponies exhibited  
376 higher plasmatic lysine levels across conditions. Lysine is an essential amino acid for  
377 metabolism and immune response. Although the role of its derivative on the immune system  
378 is yet to be clarified<sup>43</sup>, it is a natural ligand of the GPRC6 receptor<sup>44</sup> that can modulate Th-2  
379 response and antibody production by B cells<sup>45</sup>. Second, butyrate-producing bacteria and  
380 other bacteria able to metabolize  $\beta$ -hydroxybutyrate into butyrate (e.g. *Coproccoccus*) defined  
381 differential baselines between pony susceptibility groups under worm-free conditions. The  
382 former is known to favour an anti-inflammatory state by inhibiting the neutrophil  
383 inflammasome and the release of pro-inflammatory cytokines like IL-1 $\beta$  and IL-18<sup>46,47</sup>.  
384 Butyrate binds free fatty acid receptors, like FFAR2 that is enriched on neutrophil cell  
385 surface<sup>36</sup>, thereby promoting their intestinal recruitment<sup>48</sup>. Third, faecal *Fibrobacter* was a core  
386 discriminating feature of the intrinsic resistance potential. The drastic reduction of faecal  
387 *Fibrobacter* abundance in susceptible ponies upon strongylid infection mirrored past  
388 observations made in pigs infected with *T. suis*, for which the reduction occurred irrespective  
389 of the worm load<sup>49</sup>. In goats, abundance of this genus was negatively correlated with the pro-  
390 inflammatory cytokines TNF $\alpha$  that is produced by monocytes<sup>50</sup>. *Fibrobacter* bacteria are key  
391 cellulose degraders that produce succinate subsequently converted into propionate, another  
392 short-chain fatty acid able to modulate the recruitment of monocytes and neutrophils<sup>36</sup>. The  
393 reduction of this bacterial genera could hence result in a pro-inflammatory state favourable  
394 to the development of strongyle infection in susceptible ponies.

395 This immuno-metabolic network tying the host metabolites with its gut microbiota also points  
396 towards a key role of neutrophils in the definition of strongylid susceptibility. In line with this  
397 strand of evidence, we found a consistent covariation between circulating neutrophils and  
398 intrinsic susceptibility to strongylid infection. This relationship was however not validated in  
399 another independent population with higher excretion levels than that found during our 2015  
400 experiment. The role played by neutrophils hence remains to be fully characterized as for

401 other host-helminth models<sup>51,52</sup>. Transient neutrophilia (in the range of  $9 \times 10^9$  cells per L) was  
402 previously described as the only haematological variation in ponies subjected to experimental  
403 infection by cyathostomins<sup>23</sup>. But neutrophils are not typically associated with type 2 immunity  
404 - that is effective against helminths<sup>53</sup> - and they do not play a role against the infection by  
405 *Trichinella spiralis*, a clade I nematode<sup>54</sup>. However, neutrophils can cooperate with  
406 macrophages to bring nematode infection under control as found for *Litomosoides*  
407 *sigmodontis*<sup>55</sup>, *Strongyloides stercoralis*<sup>56</sup> and *Heligmosomoides polygyrus*<sup>57</sup>. They also  
408 appear to be regulated by the type-2 cytokinic environment to prevent damages to the host<sup>51</sup>.  
409 In horses, neutrophils respond to IL-4 stimulation - a type 2 cytokine - by an increase in the  
410 pro-inflammatory cytokines TNF- $\alpha$  and IL-8 but a decrease in IL-1- $\beta$ <sup>58</sup> that could be detrimental  
411 to the anti-helminth response. The covariation between neutrophil counts and the enhanced  
412 susceptibility in horses may thus result from qualitative differences. Application of single-cell  
413 RNAseq on neutrophil populations from the two pony backgrounds could provide significant  
414 advances in the understanding of their respective properties. Neutrophils were however not  
415 part of the recently released equine mononuclear cells atlas<sup>59</sup>. Quantification of cytokines and  
416 reactive oxidative species production after *in vitro* exposure to infective strongylid larvae  
417 could also unravel distinct properties and putative bias toward a more effective response in  
418 resistant individuals.

419 Overall, this work suggests that FEC records from at least two years are sufficient to define  
420 the resistance potential of an equid to strongyle infection. It also proposes phenylalanine,  
421 monocyte counts and faecal *Prevotella* abundance as biomarkers of infection. Last, we  
422 identify a neutrophil-centered network tying together gut microbiota members and a few  
423 metabolites as the discriminant baseline between susceptible and resistant individuals. These  
424 results open novel perspectives for the understanding of strongylid susceptibility in equids  
425 and for nutritional modulation of these infections.

426

## 427 **Materials and methods**

428 This study relied on measurements previously gathered during the one described previously<sup>25</sup>.  
429 Measured features are summarized herein and additional <sup>1</sup>H-NMR and FEC parameters  
430 collected during this experiment are described. Data were analysed with R version 4.0.2  
431 unless stated otherwise.

### 432 **Selection and monitoring of 20 ponies with divergent susceptibility profile to** 433 **strongyle infection.**

434 Ponies were selected from the experimental herd according to their FEC history recorded  
435 since 2010. Briefly, individual pony random effect was estimated from individual records after  
436 correction for environmental fixed effects including year, season, age at sampling, time since  
437 last treatment and last anthelmintic drug received. This was implemented for the only ponies  
438 recorded thrice a year, over at least 2 years. Using these estimates, the ten most susceptible  
439 and ten most resistant ponies were retained for this study. Median FEC over the past 5 years  
440 were 800 and 0 eggs/g for S and R ponies respectively<sup>25</sup>. These two groups of ponies were  
441 monitored throughout a grazing season during summer 2015.

442 To remove any intercurrent nematode infection, ponies were administered moxidectin and  
443 praziquantel (Equest Pramox<sup>®</sup>, Zoetis, Paris, France, 400 µg/kg of body weight of moxidectin  
444 and 2,5 mg/kg of praziquantel) three months before the start of the experiment and kept in-  
445 door. They were subsequently placed on a 7.44 ha pasture from mid-June to the end of  
446 October 2015. To eliminate residual egg excretion observed in some ponies, they were  
447 treated with pyrantel (Strongid<sup>®</sup> paste, Zoetis, Paris, France; single oral dose of 1.36 mg  
448 pyrantel base per kg of body weight) 30 days after the onset of pasture season.

449 To identify blood biomarkers of infection, plasma samples were taken at 0, 24 and 132 days  
450 after the start of the trial to compare metabolomes of parasite-free horses (maintained in-door  
451 or grazing) with that of infected grazing individuals. These were matched with FEC, average

452 daily weight gain (ADG), haematological and blood biochemistry parameters and faecal  
453 microbiota as previously outlined<sup>25</sup>. Nutritional information has been outlined previously<sup>25</sup>.  
454 All experiments were conducted in accordance with EU guidelines and French regulations  
455 (Directive 2010/63/EU, 2010; Rural Code, 2018; Decree No. 2013-118, 2013). All experimental  
456 procedures were evaluated and approved by the Ministry of Higher Education and Research  
457 (APAFIS# 2015021210238289\_v4, Notification-1). Procedures involving horses were  
458 evaluated by the ethics committee of the Val de Loire (CEEA VdL, committee number 19) and  
459 took place at the INRAE, Experimental unit of Animal Physiology of the Ofrasière (UE-1297  
460 PAO, INRAE, Centre de Recherche Val de Loire, Nouzilly, France)

461

#### 462 **Clinical parameters measurement and modelling**

463 FEC were performed on 5 g of fresh faecal material after intra-rectal sampling and diluted in  
464 70 mL of NaCl solution (d = 1.2) following a modified McMaster technique with a sensitivity  
465 of 50 eggs/g<sup>60</sup>.

466 Haematological and serum biochemical parameters were recorded at PFIE (UE-1277 PFIE,  
467 INRAE, <https://doi.org/10.15454/1.5535888072272498e12>). Haematological parameters  
468 were determined after 15-min stirring at room temperature with a MS9-5 Haematology  
469 Counter<sup>®</sup> (digital automatic haematology analyzer, Melet Schloesing Laboratories, France).  
470 Recorded parameters encompassed erythrocyte, micro- and macro-erythrocyte counts,  
471 associated mean corpuscular volume, haematocrit, and mean corpuscular haemoglobin  
472 concentration. In addition, circulating thrombocytes were counted as well as leukocytes  
473 including lymphocytes, monocytes, neutrophils, basophils and eosinophils. For further  
474 analysis, an albumin to globulin ratio (AGR) was also considered.

475 In addition, serum biochemical parameters were quantified using Select-6V rings with the M-  
476 Scan II Biochemical analyser (Melet Schloesing Laboratories, France). These parameters



477 included albumin, cholesterol, globulin, glucose, alkaline phosphatase (ALP), total proteins  
478 (TP) and urea concentrations.

479 Normality of haematological and biochemistry parameters was tested with the Shapiro-Wilk's  
480 test (*shapiro.test()* function in R) and variables showing test value below 0.90, *i.e.* FEC,  
481 glucose, ALP and AGR concentrations, and eosinophil count were log-transformed  
482 (supplementary Table 4). Validation of monocyte and neutrophil counts were obtained from a  
483 group of 25 ponies in October 2020 using the same setting.

484

### 485 **Proton Nuclear Magnetic Resonance (<sup>1</sup>H NMR) data acquisition and processing**

486 Samples were collected in heparin coated tubes. Whole blood drawn for plasma generation  
487 was refrigerated immediately at 4°C to minimize the metabolic activity of cells and enzymes  
488 and kept the metabolite pattern almost stable. After clotting at 4°C, the plasma was separated  
489 from the blood cells and subsequently cryopreserved at -80°C and shipped as a single batch  
490 for <sup>1</sup>H-NMR profiling. Plasma samples were thawed on ice, 200 µl were mixed with 500 µl of  
491 deuterium oxide (D<sub>2</sub>O) containing sodium trimethylsilylpropionate (TSP, 1 mM). Samples were  
492 vortexed, centrifuged (5,500 g; 10 min; 4°C) and 600 µL of supernatant were transferred into  
493 5 mm NMR tubes.

494 The <sup>1</sup>H-NMR analysis was performed on a Bruker Avance III HD spectrometer (Bruker,  
495 Karlsruhe, Germany) operating at 600.13 MHz, and equipped with a 5 mm reversed <sup>1</sup>H-<sup>13</sup>C-  
496 <sup>15</sup>N-<sup>31</sup>P cryoprobe connected to a cryoplatfrom. <sup>1</sup>H NMR spectra were acquired using a Carr-  
497 Purcell-Meiboom-Gill (CPMG) spin echo pulse sequence with a 2-second relaxation delay.  
498 The spectral width was set to 20 ppm and 128 scans were collected with 32k points. Free  
499 induction decays were multiplied by an exponential window function (LB=0.3 Hz) before  
500 Fourier Transform.

501 Spectra were manually phase and baseline corrected using Topspin 3.2 software (Bruker,  
502 Karlsruhe, Germany). All spectra were referenced to TSP (d 0 ppm). The spectral data were

503 imported in the Amix software (version 3.9, Bruker, Rheinstetten, Germany) to perform data  
504 reduction in the region between 9.0 and 0.5 ppm with a bucket width of 0.01 ppm. The region  
505 between 5.1 and 4.5 ppm corresponding to water signal was excluded and data were  
506 normalized to the total intensity of the spectra.

507 <sup>1</sup>H-NMR data were filtered from noise-related signals and finally consisted in 791 buckets  
508 ranging from 8.585 to 0.505 ppm (Supplementary Table 1). Buckets were annotated based  
509 on similarity of chemical shifts and coupling constants between plasma samples and  
510 reference compounds. The comparison was performed between one dimensional analytical  
511 data and reference compounds acquired under the same analytical conditions in our internal  
512 database, as well as from public databases like the Human Metabolome Database (HMDB,  
513 <http://hmdb.ca/>) and the Biological Magnetic Resonance Data Bank  
514 (<http://www.bmrb.wisc.edu/>). Manually curation was performed to isolate buckets  
515 corresponding to the same metabolite. Intensities of these metabolite-specific buckets were  
516 summed together to define metabolite-associated signals (hereafter referred to as “signals”),  
517 yielding 119 signals for further analysis.

518 To prevent spurious signals linked to age differences between individuals, metabolite levels  
519 at D0 were regressed upon pony age. None of the 119 metabolite signal intensities showed  
520 variation associated with pony ages at the considered cut-off (FDR < 5%).

521

## 522 **16S faecal microbiota data for data integration**

523 Total microorganism’s DNA was extracted from aliquots of frozen fecal samples (200 mg),  
524 using E.Z.N.A.<sup>®</sup> Stool DNA Kit (Omega Bio-Tek, Norcross, Georgia, USA). The V3-V4 16S  
525 rRNA gene amplification and sequencing have been described elsewhere<sup>25</sup>.

526 For data integration purpose (described in next paragraph), 16S rRNA gene sequencing data  
527 generated from these ponies were re-analysed using qiime2 v.2020.2<sup>61</sup>. Adapter and primers  
528 were removed from sequencing data using cutadapt v2.1<sup>62</sup>. Trimmed data was subsequently

529 imported into qiime2, and denoised using the Divisive Amplicon Denoising Algorithm from  
530 dada2<sup>63</sup>. In this workflow, Operational Taxonomic Units (OTU, sequence cluster defined by  
531 their dissimilarity level) are replaced by so-called amplicon sequence variant (ASV) that  
532 matches observed genetic variation in bacterial 16S rRNA gene amplicons instead of relying  
533 on a clustering operation<sup>64</sup>. Reads were quality filtered (maximal expected error of 1 for both  
534 reads), chimera trimmed (following the default “consensus” option) and the reads trimmed (6  
535 and 20 bp for forward and reverse reads respectively) to yield 3,054,206 reads. ASVs were  
536 subsequently filtered to retain that found in at least two individuals and supported by five  
537 reads, before alignment and phylogeny building with mafft and fasttree respectively. ASVs  
538 were subsequently assigned taxonomy using a naive Bayes classifier trained on the green  
539 genes reference database (gg\_13\_8) clustered at 99% similarity. This workflow left 6,208  
540 ASVs that were aggregated to 91 genera with phyloseq (v.1.32) for subsequent analysis. Total  
541 sum scaling normalization was applied to each taxa abundances for subsequent data  
542 integration analysis.

543 The raw sequences of the gut metagenome 16S rRNA targeted locus are available in NCBI  
544 under the Sequence Read Archive (SRA), with the BioProject number PRJNA413884 and SRA  
545 accession numbers from SAMN07773451 to SAMN07773550.

546

## 547 **Statistical analysis and data integration**

548 Our experiment focused on R and S ponies monitored during a pasture season. Using this  
549 experimental design, we interrogated their respective metabolomes 1) to characterize  
550 metabolite trajectories throughout a pasture season, 2) to identify biomarkers that would  
551 predict the pony intrinsic resistance potential, 3) to identify biomarkers that could be used to  
552 differentiate between ponies reaching FEC cut-off for anthelmintic treatment at the end of  
553 pasture season. We restricted this analysis to ponies whose predicted resistance status  
554 matched the observed FEC value at the end of pasture season, leaving nine true R (**TR**) and

555 eight true S (**TS**) ponies respectively. Statistical analyses applied for each of these three  
556 objectives are presented below.

### 557 ***Multivariate analysis of longitudinal metabolomic data in TR and TS ponies***

558 First, we aimed to characterize metabolomic modifications occurring in TR and TS ponies  
559 throughout a grazing season. To analyse our longitudinal data, we implemented an ANOVA-  
560 Simultaneous Component Analysis (ASCA)<sup>65,66</sup> with the MetaboAnalyst R package v.3.0.3<sup>67</sup>.  
561 This analysis first partitions the variance contained in the metabolite data across the factors  
562 of interest (susceptibility group and time point including 0, 24 or 132 days after onset of the  
563 pasture season) and their interactions, thereby correcting the data for these effects.  
564 Simultaneously, a PCA is applied to each partition for dimensionality reduction ultimately  
565 isolating the metabolites contributing most to each effect. Significance of each effect was  
566 tested by 1,000 permutations. Following ASCA, 37 outlier metabolite signals were identified  
567 and subsequently removed from further data integration analysis leaving 319 signals for  
568 subsequent analysis.

### 569 ***Differential analysis of signal metabolite intensities between TR and TS ponies and*** 570 ***between ponies in need of treatment***

571 Second, we aimed to identify biomarkers that would either be predictive of the intrinsic  
572 resistance potential of an individual (TR vs. TS comparison at day 0) or would distinguish  
573 between individuals in need of treatment (TR vs. TS comparison at day 132). To fulfill these  
574 two aims, we respectively performed Student's *t* tests on the 319 retained metabolite signals  
575 between TR and TS pony baselines or between individuals showing FEC below or above 200  
576 eggs/g at day 132. To account for multiple testing, nominal *P*-values were adjusted using the  
577 Benjamini-Hochberg correction (FDR) as implemented in the *p.adjust* function (stats package  
578 v.4.0.2). Spearman's correlations were estimated using the *rcorr* function from the Hmisc  
579 package v.4.4-1<sup>68</sup>.

### 580 ***Data integration to identify biomarkers predictive of parasite resistance or need of*** 581 ***treatment***

582 As a complementary approach for biomarker identification, clinical (including blood cell  
583 population profile, blood biochemistry and average daily weight gain), metabolomic (319  
584 signals) and faecal microbiota data were integrated to identify correlated signals associated  
585 with intrinsic resistance potential or need of treatment. This approach also has the potential  
586 to uncover biological signals that would be missed when considering each dataset  
587 independently<sup>33</sup>. We ran two analyses to extract the features from each dataset with best  
588 discriminant ability between TR and TS ponies either before the pasture season on one hand,  
589 or between TR and TS ponies in need of treatment at day 132 on the other hand.

590 In this analysis, ASV counts estimated from faecal microbiota data were aggregated at the  
591 genus level within each time point of interest (day 0 or day 132) using the *tax\_glom* function  
592 of the phyloseq package v.1.32.0. They were then filtered to retain those reaching 5%  
593 prevalence (n = 45 and 41 at day 0 and day 132 respectively), and normalized with the  
594 centered log-ratio transformation of the mixOmics package<sup>69</sup>. <sup>1</sup>H NMR data consisted in the  
595 319 metabolite signal intensities retained following filtering and outlier identification with  
596 ASCA. Clinical data consisted of 18 parameters. At day 0, ADG was not considered as no  
597 variation occurred leaving 17 parameters. FEC was not considered as it was used to define  
598 the groups to be compared.

599 Data integration was performed following the DIABLO (data integration analysis for biomarker  
600 discovery using latent variable approaches for Omics studies) framework<sup>70</sup> as implemented  
601 in the mixOmics package v.6.12.2. This algorithm implements a sparse generalized canonical  
602 correlation discriminant analysis (sGCC-DA)<sup>33,70</sup>. Briefly, DIABLO performs feature selection,  
603 thereby retaining the only bacterial genera, metabolite signal or clinical parameters with best  
604 discriminative ability between groups. Using this sparse dataset, DIABLO then seeks for latent  
605 components (linear combinations of features from each dataset, i.e. <sup>1</sup>H-NMR, faecal  
606 microbiota, and clinical parameters) that simultaneously explains as much as possible of the  
607 covariance between input datasets and the status of interest, i.e. pony resistance potential  
608 before or under infection<sup>33,70</sup>. We applied this analysis to discriminate between TR and TS

609 ponies either before the onset of pasture season (day 0) or at pasture turnout (day 132). In  
610 each case, the number of features to be retained was determined by cross-validation analysis  
611 (10 x 5-fold) with the *tune.block.splsda()* function exploring grids of 10 to 20 genera with  
612 increments of 5, 10 to 80 metabolite signals with increments of 10 and 5 to 10 clinical  
613 parameters with increment of 1. The correlation matrix between each input datasets was  
614 determined after running a partial least square analysis using the *pls()* function<sup>69</sup>.  
615 Following data integration, we applied linear regression models to quantify group and time  
616 variation in the levels of seven features that distinguished between TR and TS ponies both at  
617 day 0 and day 132. These most discriminant features had either an absolute contribution of  
618 0.25 on the first sGCC-DA axis. For metabolite signal intensities, no metabolite matched this  
619 condition and all features contributing to the 1st axis at day 0 and 132 were retained.

620

## 621 **Enrichment analysis**

622 To isolate biological pathways associated with discriminant <sup>1</sup>H NMR signals and bacterial  
623 taxa, enrichment analyses were run using the MetaboAnalyst v5.0<sup>67</sup> and MicrobiomeAnalyst<sup>67</sup>  
624 web interfaces respectively. Significant metabolite signals were tested for enrichment against  
625 KEGG annotated metabolites and disease related blood biomarkers, while enrichment  
626 analysis on discriminant bacterial genera were run using taxa collections associated with  
627 aging or disease. Any enrichment with a False Discovery Rate (FDR) below 5% was deemed  
628 significant.

629

## 630 **Validation in an independent set of data**

631 We validated our biological signal on microbial and metabolomic data using the data from  
632 Peachey et al.<sup>26</sup> as an independent data set because they combined both 16S rRNA gene  
633 amplicon sequencing with metabolomic analyses. While they performed <sup>1</sup>H-NMR on faecal

634 material, we wanted to evaluate how our results obtained from blood  $^1\text{H-NMR}$  could match  
635 theirs. Raw data were retrieved and processed as ours, but following Peachey et al.' read  
636 truncation parameters<sup>26</sup>. This process left 3,305,166 sequences assigned to 5,233 ASVs. ASV  
637 counts per sample and ASV taxonomic assignments from Clark et al. 2018 and Peachey et  
638 al. 2019 are available under the github repository.

639 Blood parameters of interest were validated in an independent set of 24 ponies with high FEC  
640 (821 eggs/g on average, ranging between 250 and 1700 eggs/g). Increased alkaline  
641 phosphatase had already been described in infected horses and was not considered for  
642 validation.

## 643 **Data availability statement**

644 R script is available under the <https://github.com/guiSalle/STROMAEQ> repository and  
645 associated data matrices will be made available upon manuscript acceptance. <sup>1</sup>H-NMR Data  
646 will be deposited on Metabolomicsworkbench.org upon manuscript acceptance. The raw  
647 sequences of the gut metagenome 16S rRNA targeted locus are available in NCBI under the  
648 Sequence Read Archive (SRA), with the BioProject number PRJNA413884 and SRA  
649 accession numbers from SAMN07773451 to SAMN07773550.

## 650 **References**

- 651 1. G. B. D. DALYs & Hale Collaborators. Global, regional, and national disability-adjusted  
652 life-years (DALYs) for 333 diseases and injuries and healthy life expectancy (HALE) for  
653 195 countries and territories, 1990-2016: a systematic analysis for the Global Burden of  
654 Disease Study 2016. *Lancet* **390**, 1260–1344 (2017).
- 655 2. Nieuwhof, G. J. & Bishop, S. C. Costs of the major endemic diseases of sheep in Great  
656 Britain and the potential benefits of reduction in disease impact. *Anim. Sci.* **81**, 23–29  
657 (2005).
- 658 3. Kaplan, R. M. & Vidyashankar, A. N. An inconvenient truth: Global worming and  
659 anthelmintic resistance. *Vet Parasitol* **186**, 70–78 (2012).
- 660 4. Nielsen, M. K. *et al.* Anthelmintic efficacy against equine strongyles in the United States.  
661 *Vet Parasitol* **259**, 53–60 (2018).
- 662 5. Sallé, G. *et al.* Risk factor analysis of equine strongyle resistance to anthelmintics. *Int J*  
663 *Parasitol Drugs Drug Resist* **7**, 407–415 (2017).
- 664 6. Tzelos, T. *et al.* Strongyle egg reappearance period after moxidectin treatment and its  
665 relationship with management factors in UK equine populations. *Vet Parasitol* **237**, 70–  
666 76 (2017).
- 667 7. Debeffe, L. *et al.* Negative covariance between parasite load and body condition in a



- 668 population of feral horses. *Parasitology* **143**, 983–97 (2016).
- 669 8. Rubenstein, D. I. & Hohmann, M. E. Parasites and Social Behavior of Island Feral  
670 Horses. *Oikos* **55**, 312 (1989).
- 671 9. Giles, C. J., Urquhart, K. A. & Longstaffe, J. A. Larval cyathostomiasis (immature  
672 trichonema-induced enteropathy): a report of 15 clinical cases. *Equine Vet J* **17**, 196–  
673 201 (1985).
- 674 10. Sallé, G. *et al.* Compilation of 29 years of postmortem examinations identifies major  
675 shifts in equine parasite prevalence from 2000 onwards. *Int. J. Parasitol.* (2020)  
676 doi:10.1016/j.ijpara.2019.11.004.
- 677 11. Kornaś, S. *et al.* Estimation of genetic parameters for resistance to gastro-intestinal  
678 nematodes in pure blood Arabian horses. *Int J Parasitol* **45**, 237–42 (2015).
- 679 12. Scheuerle, M. C., Stear, M. J., Honeder, A., Becher, A. M. & Pfister, K. Repeatability of  
680 strongyle egg counts in naturally infected horses. *Vet Parasitol* **228**, 103–107 (2016).
- 681 13. Gold, S. *et al.* Quantitative genetics of gastrointestinal strongyle burden and associated  
682 body condition in feral horses. *Int. J. Parasitol. Parasites Wildl.* **9**, 104–111 (2019).
- 683 14. Sallé, G. *et al.* A genome scan for QTL affecting resistance to *Haemonchus contortus* in  
684 sheep. *J Anim Sci* **90**, 4690–705 (2012).
- 685 15. Kemper, K. E. *et al.* The distribution of SNP marker effects for faecal worm egg count in  
686 sheep, and the feasibility of using these markers to predict genetic merit for resistance  
687 to worm infections. *Genet Res Camb* **93**, 203–19 (2011).
- 688 16. McRae, K. M., McEwan, J. C., Dodds, K. G. & Gemmell, N. J. Signatures of selection in  
689 sheep bred for resistance or susceptibility to gastrointestinal nematodes. *BMC*  
690 *Genomics* **15**, 637 (2014).
- 691 17. Sallé, G. *et al.* Functional investigation of a QTL affecting resistance to *Haemonchus*  
692 *contortus* in sheep. *Vet Res* **45**, 68 (2014).
- 693 18. Terefe, G. *et al.* Immune response to *Haemonchus contortus* infection in susceptible

- 694 (INRA 401) and resistant (Barbados Black Belly) breeds of lambs. *Parasite Immunol.* **29**,  
695 415–424 (2007).
- 696 19. Slusarewicz, P. *et al.* Automated parasite faecal egg counting using fluorescence  
697 labelling, smartphone image capture and computational image analysis. *Int J Parasitol*  
698 **46**, 485–93 (2016).
- 699 20. Relf, V. E., Morgan, E. R., Hodgkinson, J. E. & Matthews, J. B. A questionnaire study on  
700 parasite control practices on UK breeding Thoroughbred studs. *Equine Vet J* **44**, 466–71  
701 (2012).
- 702 21. Lester, H. E. *et al.* A cost comparison of faecal egg count-directed anthelmintic delivery  
703 versus interval programme treatments in horses. *Vet Rec* **173**, 371 (2013).
- 704 22. Sallé, G., Cortet, J., Koch, C., Reigner, F. & Cabaret, J. Economic assessment of FEC-  
705 based targeted selective drenching in horses. *Vet Parasitol* **214**, 159–66 (2015).
- 706 23. Murphy, D. & Love, S. The pathogenic effects of experimental cyathostome infections in  
707 ponies. *Vet Parasitol* **70**, 99–110 (1997).
- 708 24. Andersen, U. V. *et al.* Physiologic and systemic acute phase inflammatory responses in  
709 young horses repeatedly infected with cyathostomins and *Strongylus vulgaris*. *Vet*  
710 *Parasitol* **201**, 67–74 (2014).
- 711 25. Clark, A. *et al.* Strongyle Infection and Gut Microbiota: Profiling of Resistant and  
712 Susceptible Horses Over a Grazing Season. *Front. Physiol.* **9**, (2018).
- 713 26. Peachey, L. E. *et al.* Dysbiosis associated with acute helminth infections in herbivorous  
714 youngstock – observations and implications. *Sci. Rep.* **9**, (2019).
- 715 27. Walshe, N. *et al.* Removal of adult cyathostomins alters faecal microbiota and promotes  
716 an inflammatory phenotype in horses. *Int. J. Parasitol.* **49**, 489–500 (2019).
- 717 28. Daniels, S. P., Leng, J., Swann, J. R. & Proudman, C. J. Bugs and drugs: a systems  
718 biology approach to characterising the effect of moxidectin on the horse’s faecal  
719 microbiome. *Anim. Microbiome* **2**, 38 (2020).

- 720 29. Wang, Y. *et al.* Systems metabolic effects of a necator americanus infection in Syrian  
721 hamster. *J. Proteome Res.* **8**, 5442–5450 (2009).
- 722 30. Wu, J.-F. *et al.* Metabolic alterations in the hamster co-infected with Schistosoma  
723 japonicum and Necator americanus. *Int. J. Parasitol.* **40**, 695–703 (2010).
- 724 31. Globisch, D. *et al.* *Onchocerca volvulus* -neurotransmitter tyramine is a biomarker for  
725 river blindness. *Proc. Natl. Acad. Sci.* **110**, 4218–4223 (2013).
- 726 32. Lagatie, O. *et al.* Evaluation of the diagnostic potential of urinary N-Acetyltyramine-O, $\beta$ -  
727 glucuronide (NATOG) as diagnostic biomarker for *Onchocerca volvulus* infection.  
728 *Parasit. Vectors* **9**, 302 (2016).
- 729 33. The EPIC Consortium *et al.* Dynamic molecular changes during the first week of human  
730 life follow a robust developmental trajectory. *Nat. Commun.* **10**, (2019).
- 731 34. Wannemacher, R. W. Key role of various individual amino acids in host response to  
732 infection. *Am. J. Clin. Nutr.* **30**, 1269–1280 (1977).
- 733 35. Peters, A. *et al.* Metabolites of lactic acid bacteria present in fermented foods are highly  
734 potent agonists of human hydroxycarboxylic acid receptor 3. *PLOS Genet.* **15**,  
735 e1008145 (2019).
- 736 36. Husted, A. S., Trauelsen, M., Rudenko, O., Hjorth, S. A. & Schwartz, T. W. GPCR-  
737 Mediated Signaling of Metabolites. *Cell Metab.* **25**, 777–796 (2017).
- 738 37. Iljazovic, A. *et al.* Perturbation of the gut microbiome by *Prevotella* spp. enhances host  
739 susceptibility to mucosal inflammation. *Mucosal Immunol.* **14**, 113–124 (2021).
- 740 38. Villarino, N. F. *et al.* Composition of the gut microbiota modulates the severity of  
741 malaria. *Proc. Natl. Acad. Sci.* **113**, 2235–2240 (2016).
- 742 39. Ajibola, O. *et al.* Urogenital schistosomiasis is associated with signatures of microbiome  
743 dysbiosis in Nigerian adolescents. *Sci. Rep.* **9**, 829 (2019).
- 744 40. Stolzenbach, S. *et al.* Dietary Inulin and *Trichuris suis* Infection Promote Beneficial  
745 Bacteria Throughout the Porcine Gut. *Front. Microbiol.* **11**, 312 (2020).

- 746 41. Helmbly, H., Takeda, K., Akira, S. & Grecis, R. K. Interleukin (IL)-18 promotes the  
747 development of chronic gastrointestinal helminth infection by downregulating IL-13. *J.*  
748 *Exp. Med.* **194**, 355–364 (2001).
- 749 42. Reynolds, L. A. *et al.* MyD88 signaling inhibits protective immunity to the gastrointestinal  
750 helminth parasite *Heligmosomoides polygyrus*. *J Immunol* **193**, 2984–93 (2014).
- 751 43. Kelly, B. & Pearce, E. L. Amino Assets: How Amino Acids Support Immunity. *Cell Metab.*  
752 **32**, 154–175 (2020).
- 753 44. Wellendorph, P. *et al.* Deorphanization of GPRC6A: A Promiscuous I- $\alpha$ -Amino Acid  
754 Receptor with Preference for Basic Amino Acids. *Mol. Pharmacol.* **67**, 589–597 (2005).
- 755 45. Quandt, D., Rothe, K., Baerwald, C. & Rossol, M. GPRC6A mediates Alum-induced  
756 Nlrp3 inflammasome activation but limits Th2 type antibody responses. *Sci. Rep.* **5**,  
757 16719 (2015).
- 758 46. Youm, Y.-H. *et al.* The ketone metabolite  $\beta$ -hydroxybutyrate blocks NLRP3  
759 inflammasome-mediated inflammatory disease. *Nat. Med.* **21**, 263–269 (2015).
- 760 47. Goldberg, E. L. *et al.*  $\beta$ -Hydroxybutyrate Deactivates Neutrophil NLRP3 Inflammasome  
761 to Relieve Gout Flares. *Cell Rep.* **18**, 2077–2087 (2017).
- 762 48. Sina, C. *et al.* G Protein-Coupled Receptor 43 Is Essential for Neutrophil Recruitment  
763 during Intestinal Inflammation. *J. Immunol.* **183**, 7514–7522 (2009).
- 764 49. Wu, S. *et al.* Worm burden-dependent disruption of the porcine colon microbiota by  
765 *Trichuris suis* infection. *PLoS One* **7**, e35470 (2012).
- 766 50. Jiao, J. *et al.* Shifts in Host Mucosal Innate Immune Function Are Associated with  
767 Ruminal Microbial Succession in Supplemental Feeding and Grazing Goats at Different  
768 Ages. *Front. Microbiol.* **8**, 1655 (2017).
- 769 51. Heeb, L. E. M., Egholm, C., Impellizzeri, D., Ridder, F. & Boyman, O. Regulation of  
770 neutrophils in type 2 immune responses. *Curr. Opin. Immunol.* **54**, 115–122 (2018).
- 771 52. Allen, J. E., Sutherland, T. E. & R ckerl, D. IL-17 and neutrophils: unexpected players in

- 772 the type 2 immune response. *Curr. Opin. Immunol.* **34**, 99–106 (2015).
- 773 53. Sorobetea, D., Svensson-Frej, M. & Grecis, R. Immunity to gastrointestinal nematode  
774 infections. *Mucosal Immunol.* **11**, 304–315 (2018).
- 775 54. Michels, C. E. *et al.* Neither interleukin-4 receptor  $\alpha$  expression on CD4<sup>+</sup> T cells, or  
776 macrophages and neutrophils is required for protective immunity to *Trichinella spiralis*.  
777 *Immunology* **128**, e385–e394 (2009).
- 778 55. Al-Qaoud, K. M. *et al.* A new mechanism for IL-5-dependent helminth control: neutrophil  
779 accumulation and neutrophil-mediated worm encapsulation in murine filariasis are  
780 abolished in the absence of IL-5. *Int. Immunol.* **12**, 899–908 (2000).
- 781 56. Bonne-Année, S. *et al.* Human and Mouse Macrophages Collaborate with Neutrophils  
782 To Kill Larval *Strongyloides stercoralis*. *Infect. Immun.* **81**, 3346–3355 (2013).
- 783 57. Anthony, R. M. *et al.* Memory TH2 cells induce alternatively activated macrophages to  
784 mediate protection against nematode parasites. *Nat. Med.* **12**, 955–960 (2006).
- 785 58. Lavoie-Lamoureux, A. *et al.* IL-4 activates equine neutrophils and induces a mixed  
786 inflammatory cytokine expression profile with enhanced neutrophil chemotactic  
787 mediator release *ex vivo*. *Am. J. Physiol.-Lung Cell. Mol. Physiol.* **299**, L472–L482  
788 (2010).
- 789 59. Patel, R. S., Tomlinson, J. E., Divers, T. J., Van de Walle, G. R. & Rosenberg, B. R.  
790 Single-cell resolution landscape of equine peripheral blood mononuclear cells reveals  
791 diverse cell types including T-bet<sup>+</sup> B cells. *BMC Biol.* **19**, 13 (2021).
- 792 60. Raynaud, J. P. [Study of the efficiency of a quantitative coproscopic technic for the  
793 routine diagnosis and control of parasitic infestations of cattle, sheep, horses and  
794 swine]. *Ann Parasitol Hum Comp* **45**, 321–42 (1970).
- 795 61. Bolyen, E. *et al.* Reproducible, interactive, scalable and extensible microbiome data  
796 science using QIIME 2. *Nat. Biotechnol.* **37**, 852–857 (2019).
- 797 62. Martin, M. Cutadapt removes adapter sequences from high-throughput sequencing

- 798 reads. *EMBnet.journal* **17**, 10 (2011).
- 799 63. Callahan, B. J. *et al.* DADA2: High-resolution sample inference from Illumina amplicon  
800 data. *Nat. Methods* **13**, 581–583 (2016).
- 801 64. Callahan, B. J., McMurdie, P. J. & Holmes, S. P. Exact sequence variants should replace  
802 operational taxonomic units in marker-gene data analysis. *ISME J.* **11**, 2639–2643  
803 (2017).
- 804 65. Jansen, J. J., Hoefsloot, H. C. J., van der Greef, J., Timmerman, M. E. & Smilde, A. K.  
805 Multilevel component analysis of time-resolved metabolic fingerprinting data. *Anal.*  
806 *Chim. Acta* **530**, 173–183 (2005).
- 807 66. Smilde, A. K. *et al.* ANOVA-simultaneous component analysis (ASCA): a new tool for  
808 analyzing designed metabolomics data. *Bioinforma. Oxf. Engl.* **21**, 3043–3048 (2005).
- 809 67. Chong, J. *et al.* MetaboAnalyst 4.0: towards more transparent and integrative  
810 metabolomics analysis. *Nucleic Acids Res.* **46**, W486–W494 (2018).
- 811 68. Harrell, F. E. & Dupont, C. *Hmisc: Harrell Miscellaneous*. (2017).
- 812 69. Rohart, F., Gautier, B., Singh, A. & Lê Cao, K.-A. mixOmics: An R package for 'omics  
813 feature selection and multiple data integration. *PLoS Comput. Biol.* **13**, e1005752  
814 (2017).
- 815 70. Singh, A. *et al.* DIABLO: an integrative approach for identifying key molecular drivers  
816 from multi-omics assays. *Bioinforma. Oxf. Engl.* **35**, 3055–3062 (2019).

817

## 818 **Acknowledgements**

819 This work was funded by an Institut Français du Cheval et de l'Équitation grant. We would  
820 like to acknowledge Drs. Sonia Lamandé and Lucie Pellissier for critical comments and  
821 discussion on a previous version of the manuscript.

## 822 **Author contributions**

823 GS: analyzed the data, drafted the manuscript. CC: <sup>1</sup>H-NMR data acquisition and annotation.  
824 JC, CK, JM: sampling and parasitological data acquisition. FR: pony management and  
825 sampling. MR, NP: haematological and biochemistry data acquisition. AB: raised funding,  
826 project management. NM: analyzed the data, drafted the manuscript.

## 827 **Competing interest**

828 The author(s) declare no competing interests.

## 829 **Figure captions**

### 830 **Figure 1. FEC-informed pony potential prediction is robust through time**

831 The distribution of observed Faecal Egg Counts before the experiment (2010-2015), during  
832 the experiment (2015) and after the experiment (2015-2020) in the predicted susceptible (8  
833 individuals, 271 records; green) and resistant (9 individuals, 223 records; purple) ponies and  
834 their herd unselected counterparts (127 individuals, 1,436 measures; grey) is represented.  
835 Dots stand for individual measures and boxplots represent the data distribution (mean  
836 materialized by a vertical bar within the box that stands for the 25% to 75% interquartile  
837 range).

838

### 839 **Figure 2. Representative <sup>1</sup>H-NMR spectra measured in resistant and susceptible ponies**

840 Group average <sup>1</sup>H-NMR signal intensities are plotted against the considered chemical shifts  
841 ranging from 0.995 to 8.995 ppm and overlaid for resistant (TR; purple) and susceptible (TS;  
842 green) pony groups at day 0 (strongyle-free; panel a) or day 132 (strongyle infected; panel b).  
843 Differential intensity between groups is drawn in red. Associated metabolites are annotated  
844 by numbers.

845

846 **Figure 3. Differential metabolites between infected resistant and susceptible ponies**  
847 **(day 132)**

848 Panel a shows metabolite signal intensity distribution in each pony susceptibility group  
849 (purple: resistant, TR; green: susceptible, TS) at day 132. Panel b shows the relationship  
850 between these metabolite signal intensities (X-axis) at day 0, and matching log-transformed  
851 Faecal Egg Count (Y-axis) at day 132. Panel c describes observed phenylalanine levels in the  
852 faecal matter of an independent cohort of British horses with low or high FEC.

853

854 **Figure 4. Circos plot showing features best discriminating between infected resistant**  
855 **and susceptible ponies (day 132)**

856 For each of the three input data types (clinical data in yellow, bacterial genera in purple and  
857 metabolite signals in orange), the features best discriminating between resistant and  
858 susceptible ponies are listed. A link is materialized between two features if their shared  
859 correlation is above 0.45 (chocolate if positive, grey otherwise). External green and purple  
860 lines represent the relative feature level in each pony susceptibility group (resistant, TR:  
861 purple; susceptible, TS: green). MGV: Mean Globular Volume; TP: Total Protein; ALP: Alkaline  
862 Phosphatase; U14, U25: Unknown metabolites 14 and 25.

863

864 **Figure 5. Validation of the most discriminant features between resistant and susceptible**  
865 **ponies under strongylid infection**

866 Each row presents the feature level in resistant and susceptible ponies (left panels) and the  
867 association with Faecal Egg Count recorded in an independent set of ponies or horses (for  
868 the *Prevotella* genus). CLR: Centered Log-Transformed. The figure highlights the significant  
869 positive relationship between circulating monocyte count and faecal abundance of the  
870 *Prevotella* genus in independent individuals.

871

872



Before the experiment  
(2010 – 2015)

During the experiment  
(June 2015 – October 2015)

Following the experiment  
(2016 – 2020)

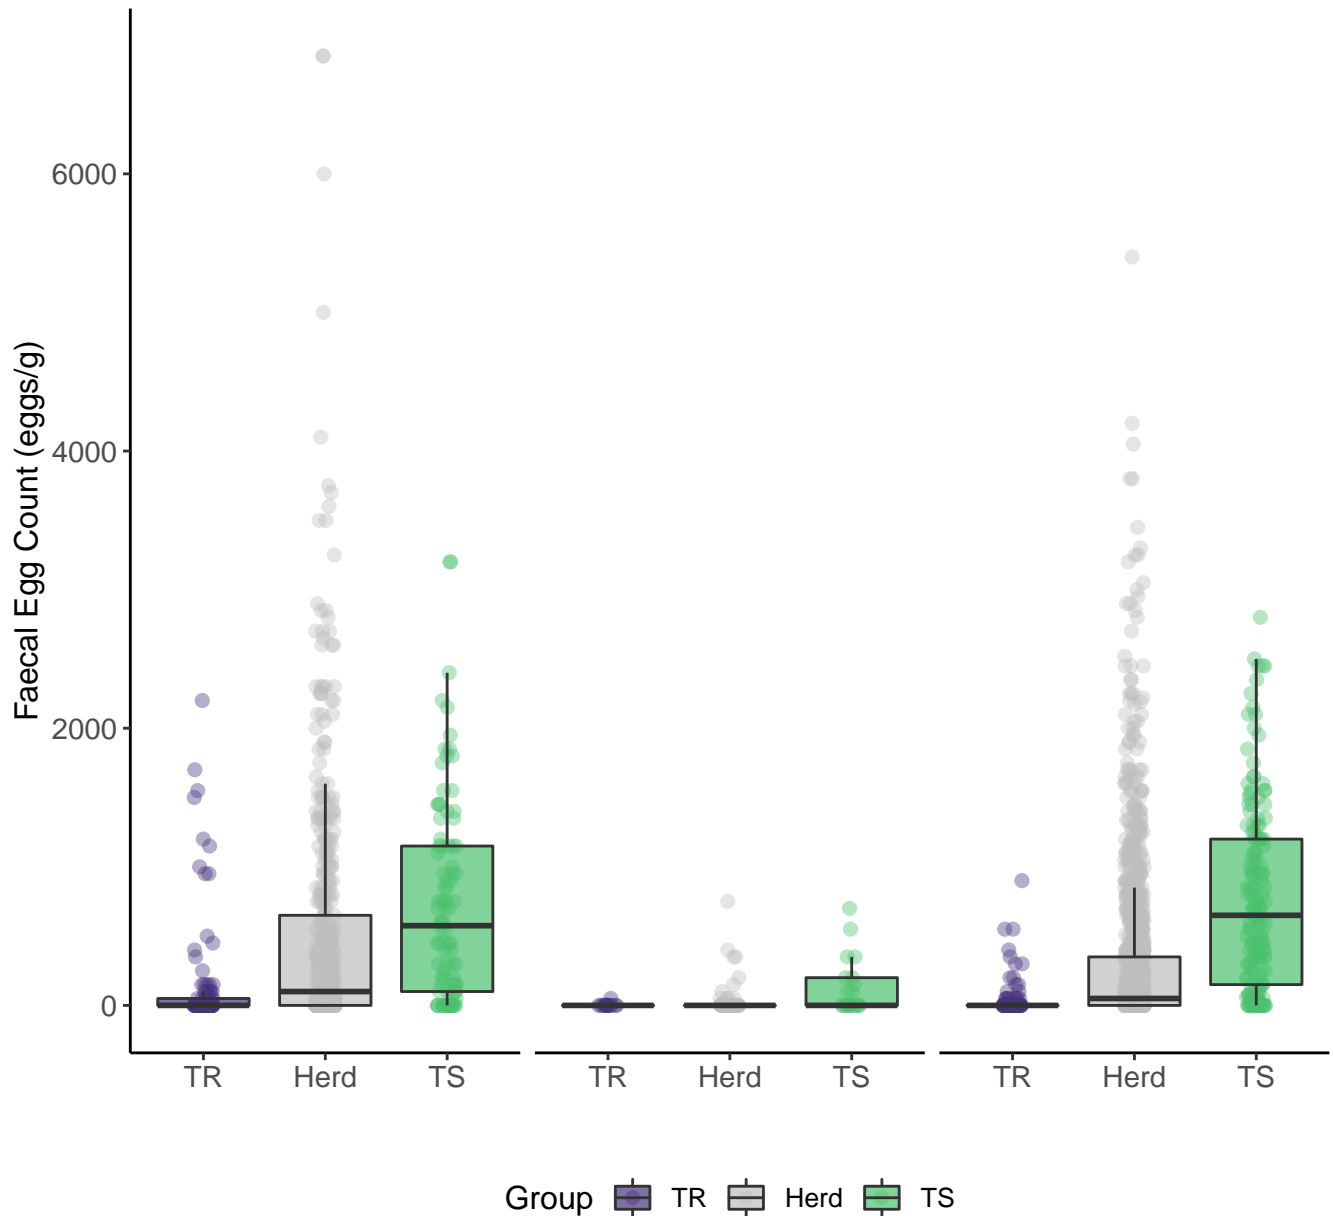

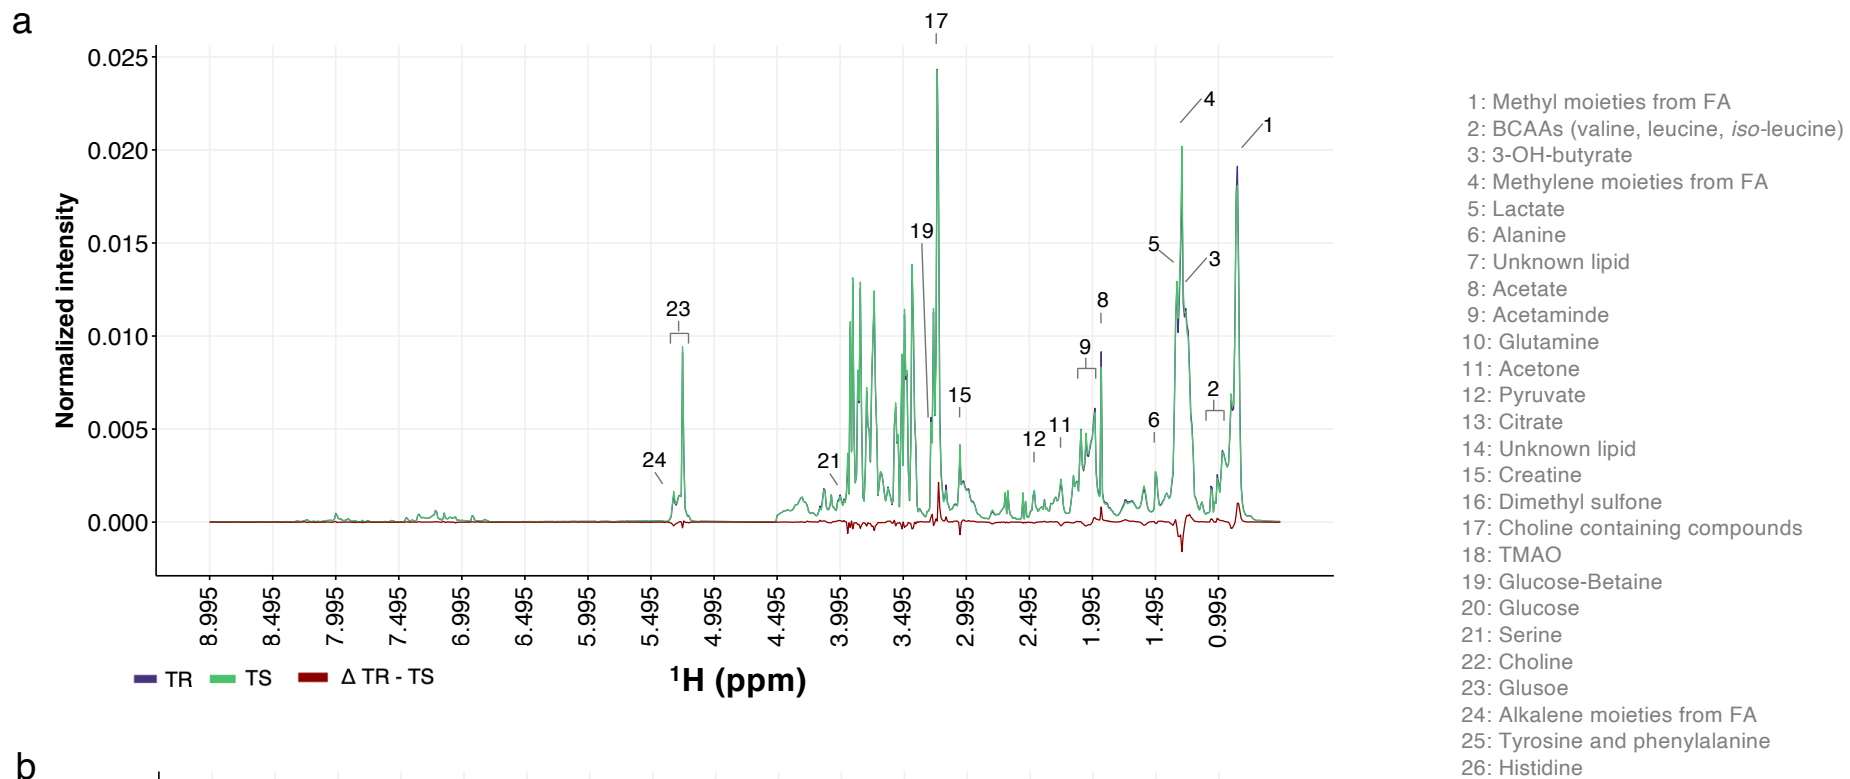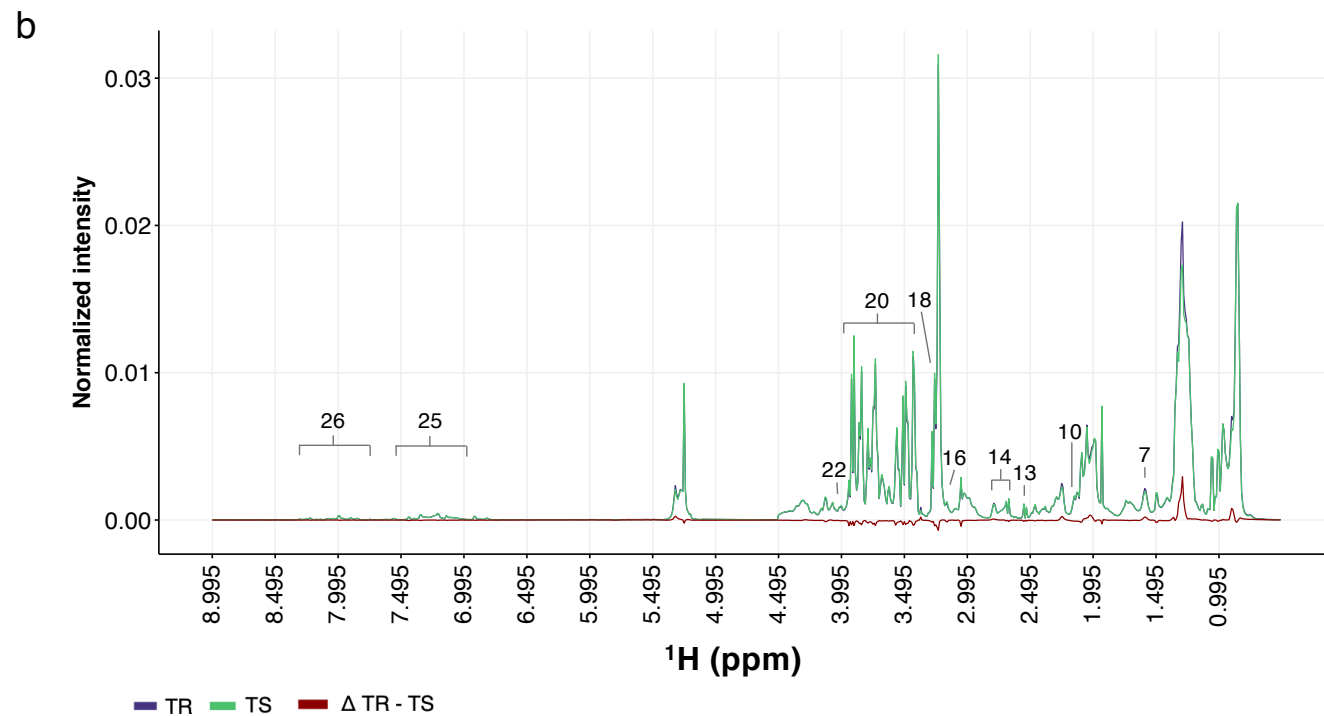

A

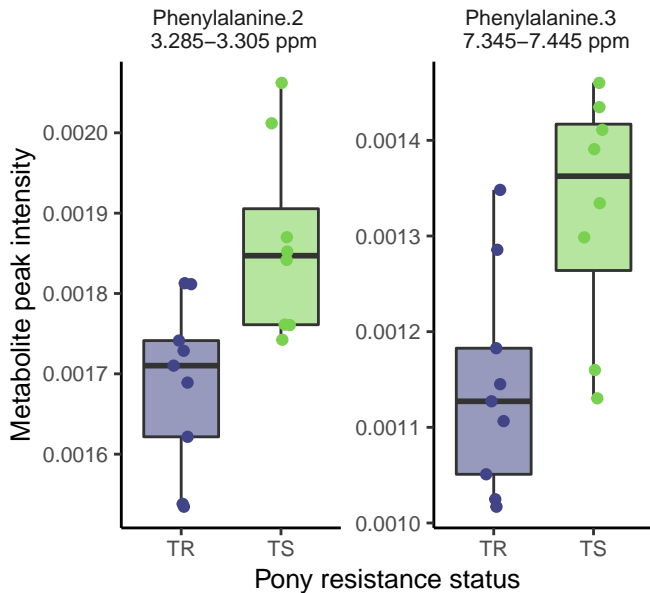

B

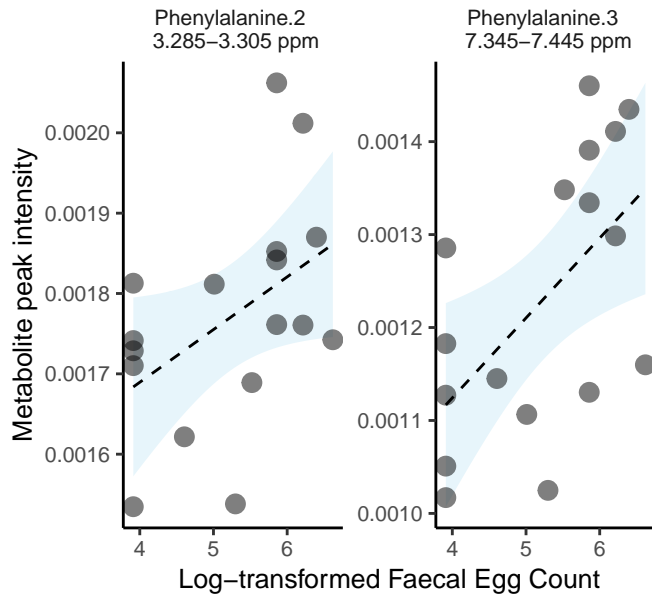

C

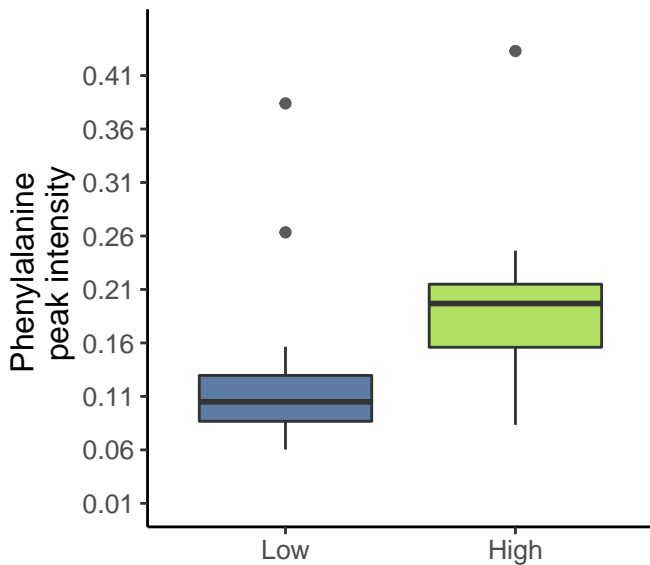

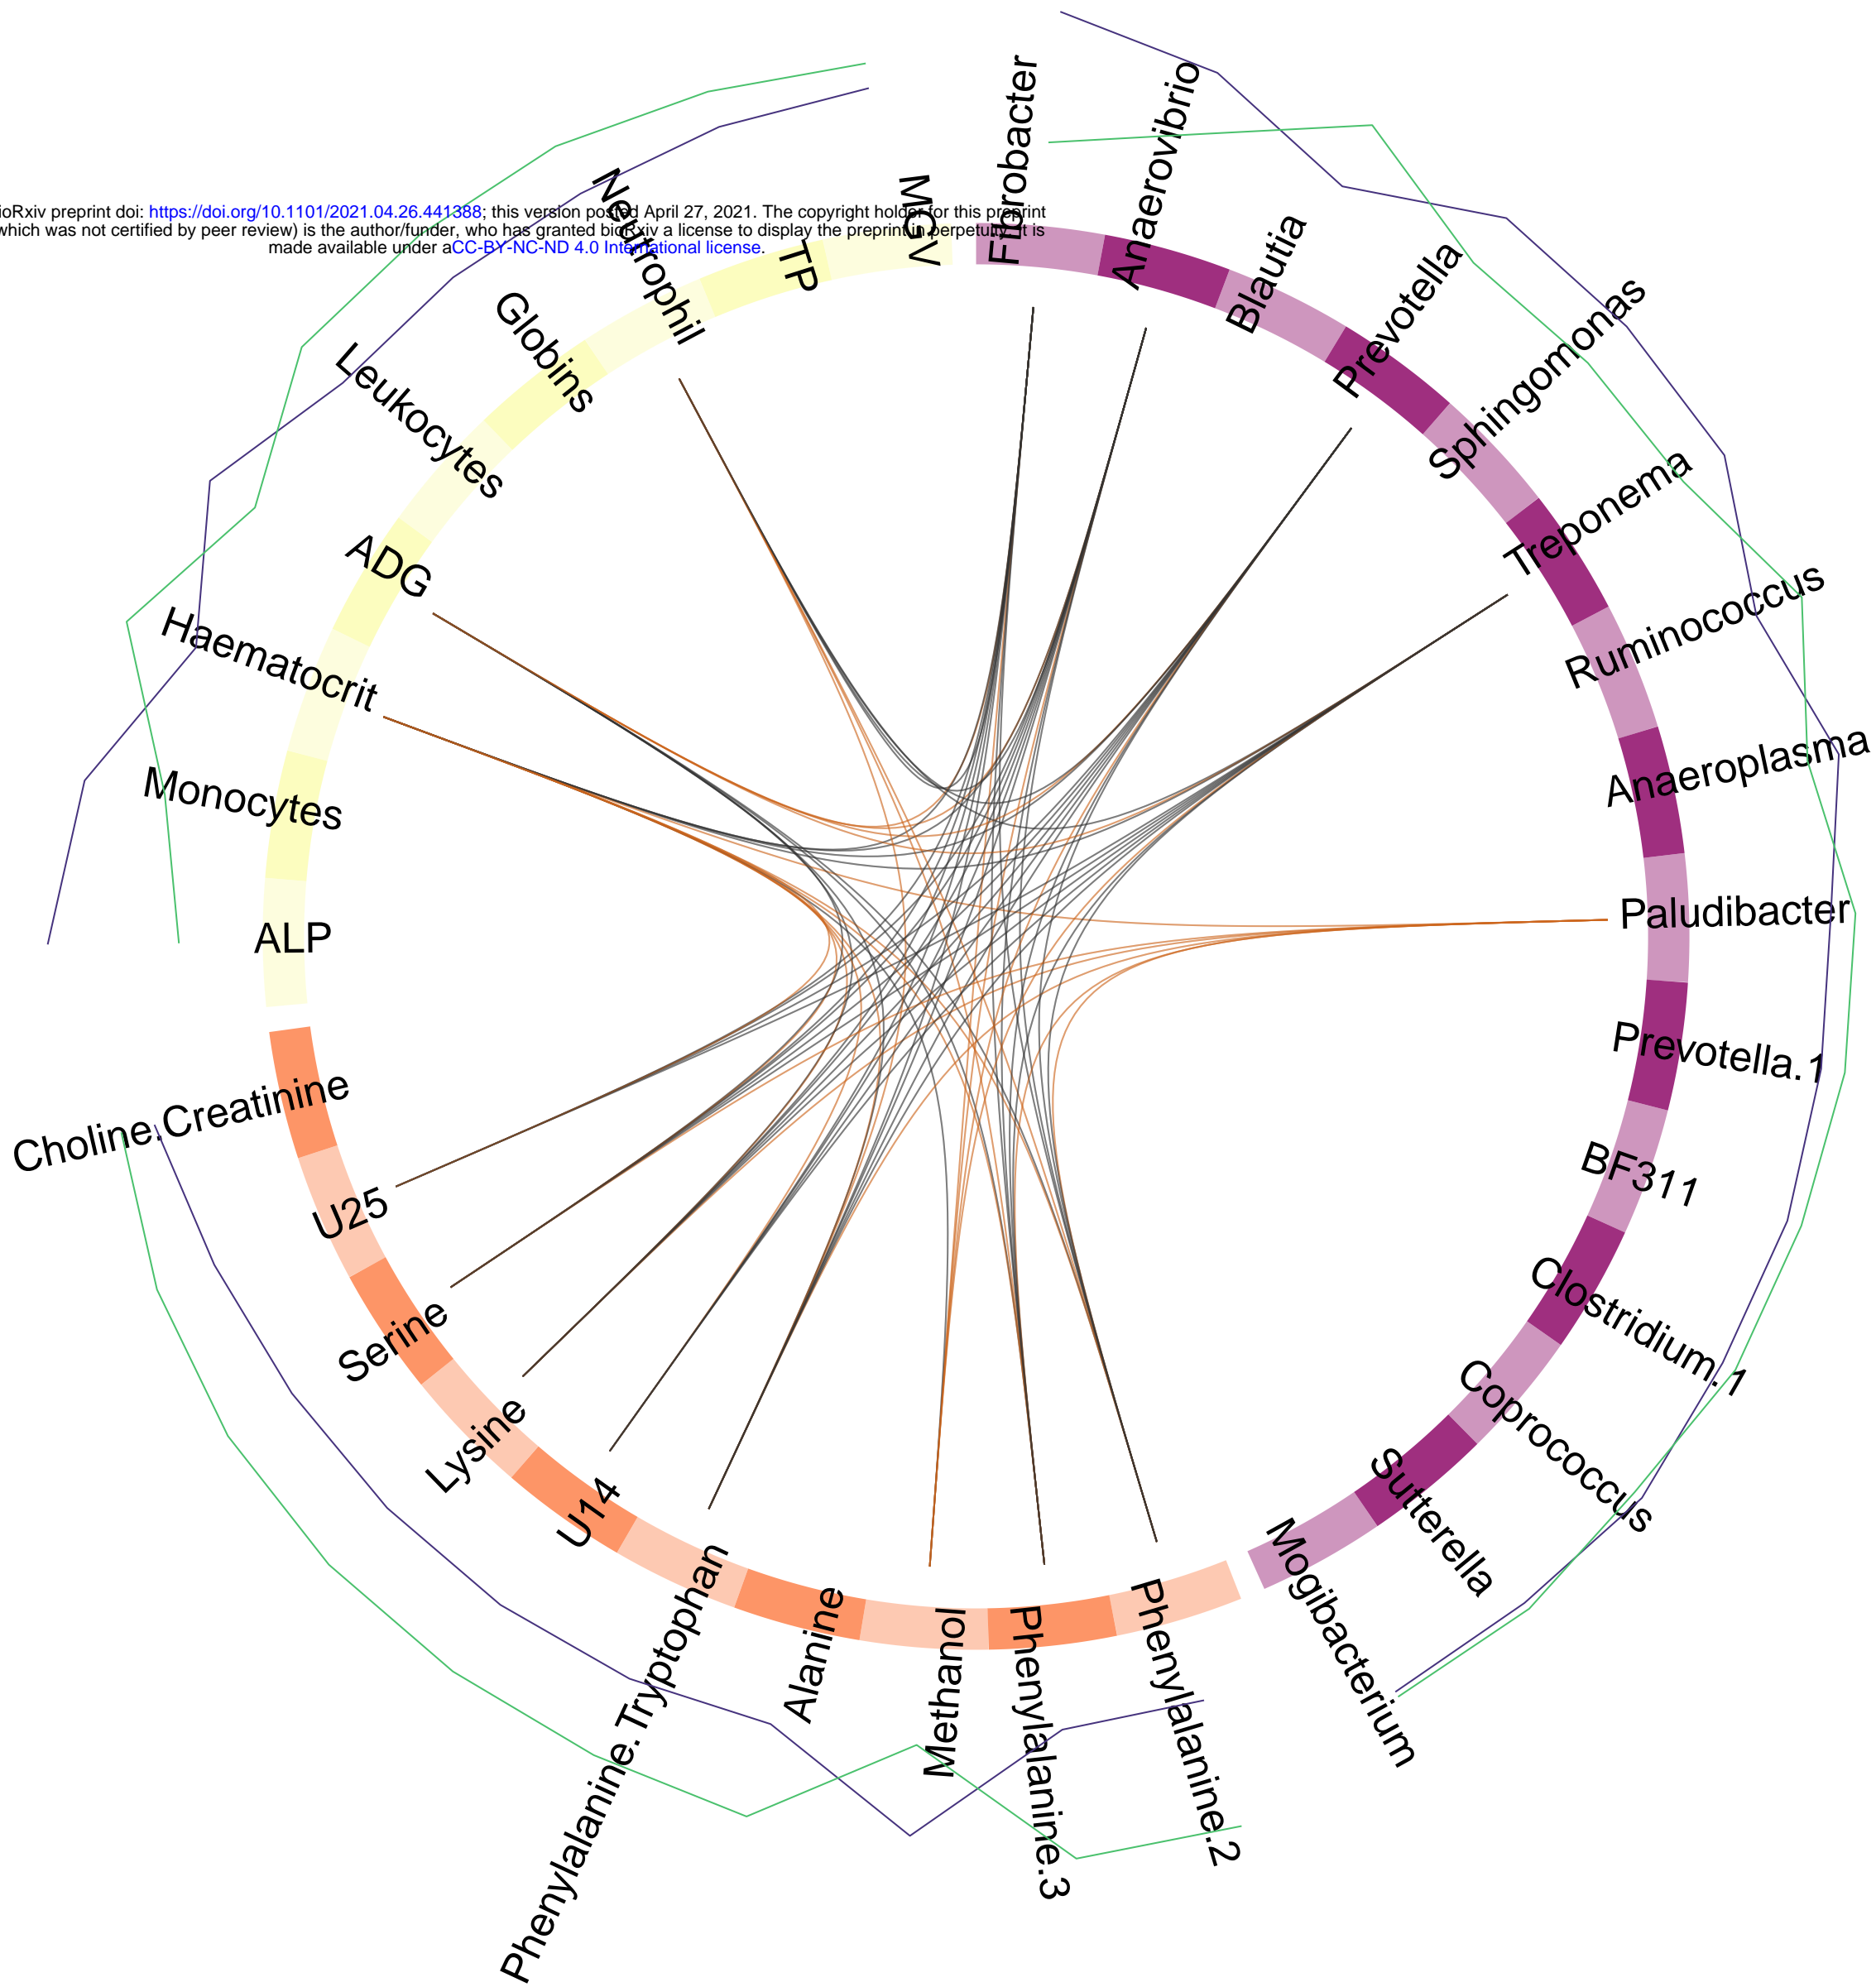

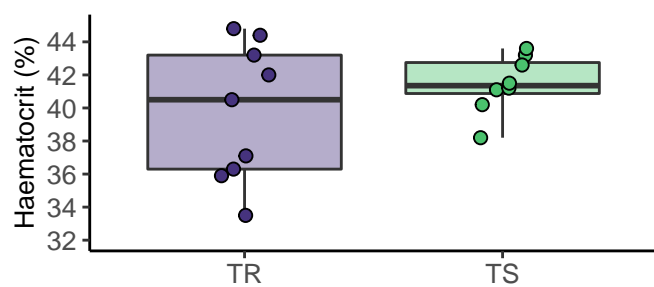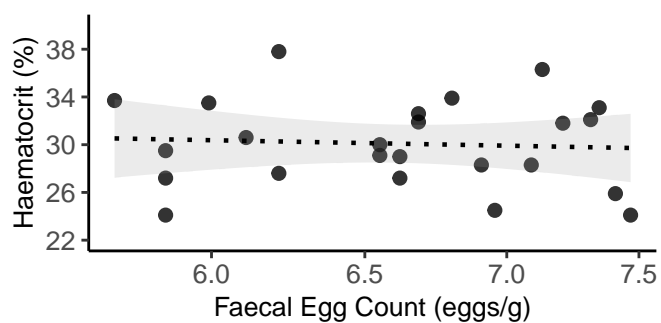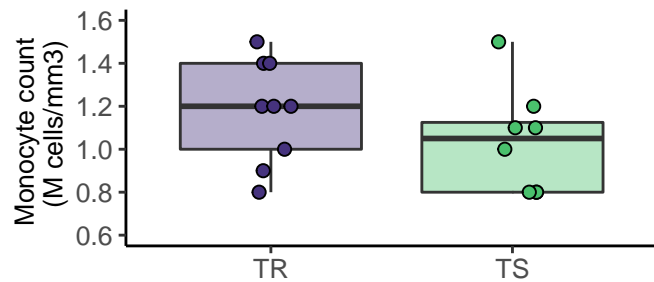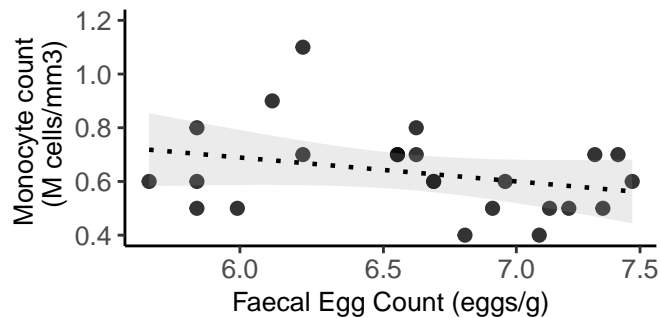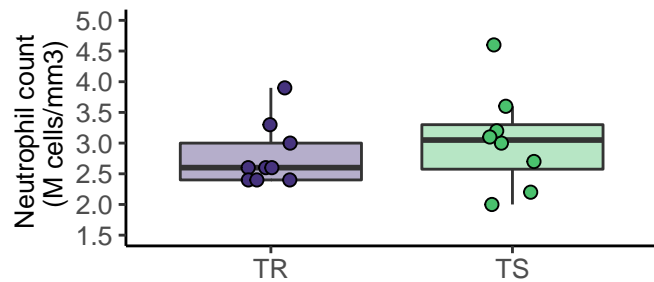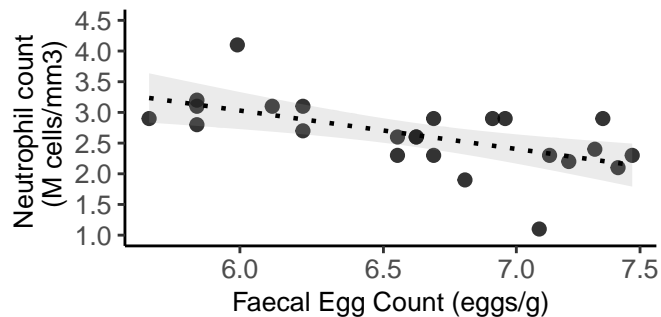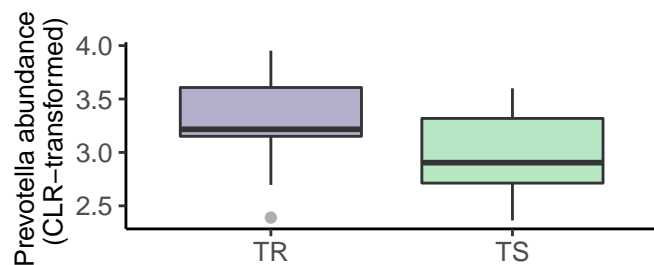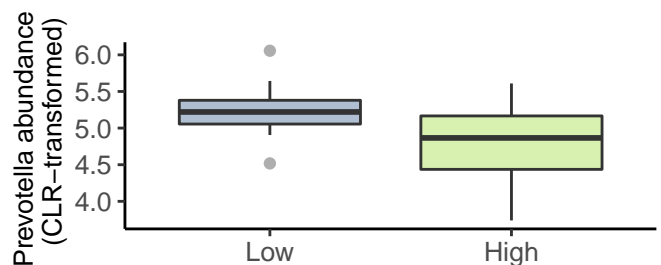

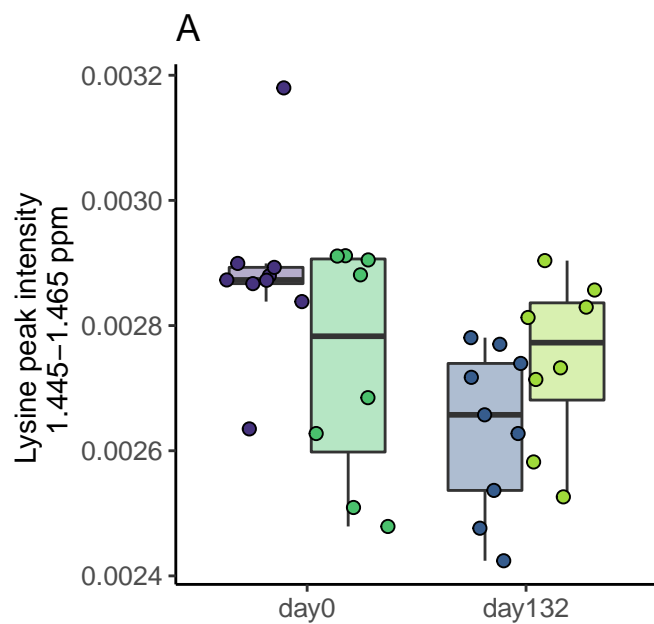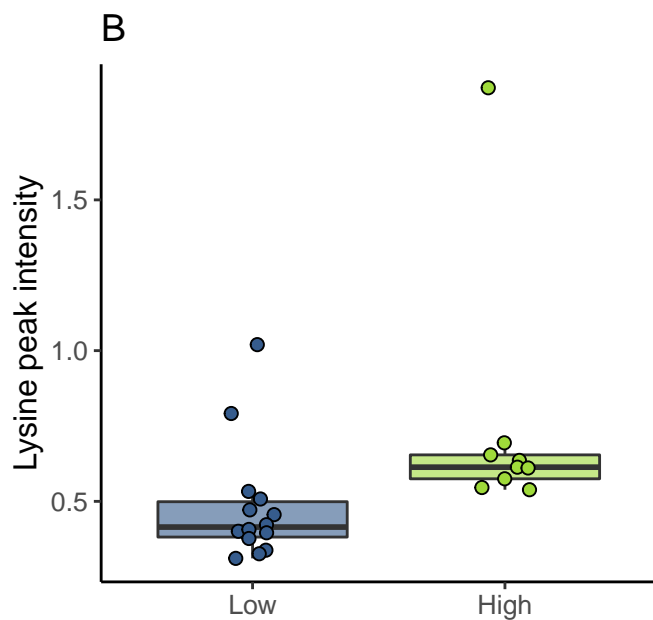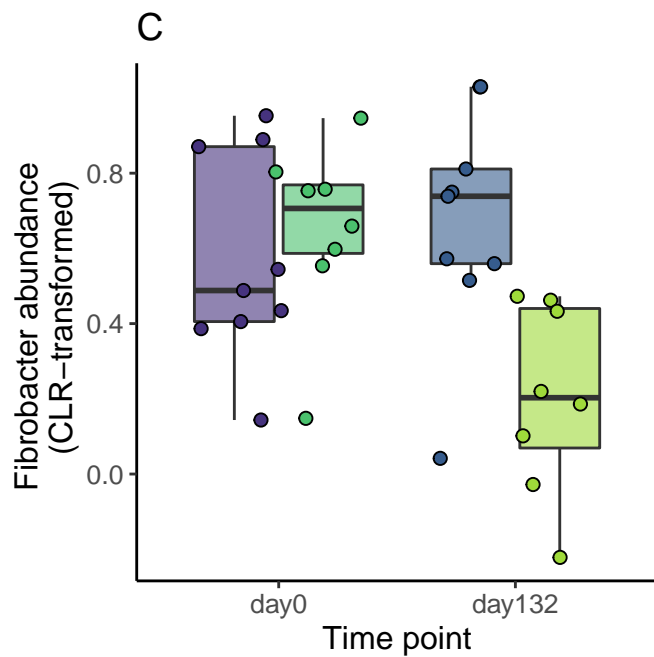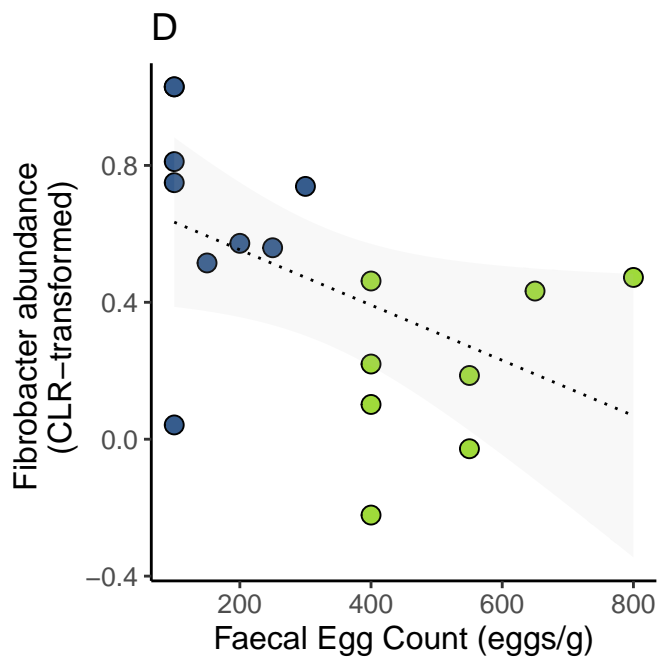

Source: http://biorxiv.org/content/10.1101/2021.04.26.441388v1.full.pdf
